# Supplementary material
Source: publisher site journal article supplement (https://www.degruyterbrill.com/publication/isbn/9783839458860/downloadAsset/9783839458860_Leseprobe.pdf)
Supplement: Supplementary file 1 [file 9783839458860_Leseprobe.pdf]

Julia Holzmann

# GESCHICHTE DER SKLAVEREI IN DER NIEDERLÄNDISCHEN REPUBLIK

Recht, Rassismus und die Handlungsmacht  
Schwarzer Menschen und People of Color,  
1680–1863

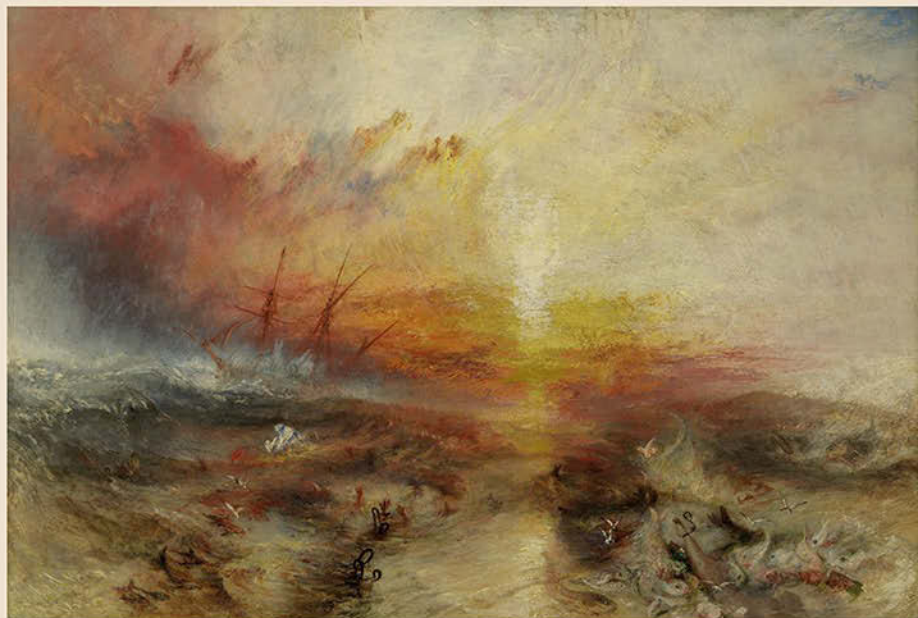

**[transcript]** Global- und Kolonialgeschichte

**Aus:**

*Julia Holzmann*

## **Geschichte der Sklaverei in der niederländischen Republik**

Recht, Rassismus und die Handlungsmacht Schwarzer Menschen  
und People of Color, 1680-1863

April 2022, 324 S., kart., 3 Farbbabb.

49,00 € (DE), 978-3-8376-5886-6

E-Book: kostenlos erhältlich als Open-Access-Publikation

PDF: ISBN 978-3-8394-5886-0

1776 wurde in der niederländischen Republik ein Gesetz erlassen, das ausschließlich für Schwarze Menschen und People of Color gelten sollte, die als Sklav\*innen in die Niederlande kamen. Wie und warum geschah das? Was bedeutete das für die betroffenen Menschen und deren Lebensalltag? Anhand eines großen und in weiten Teilen bisher unerforschten Quellenkorpus geht Julia Holzmann diesen Fragen interdisziplinär und intersektional nach. Sie\* untersucht die enge Verflechtung zwischen Kolonien und Metropole sowie rechtlichen, sprachlichen und sozialen Praktiken, darunter auch Rassismus. Ihre\* biografischen Mikrostudien geben Einblick in die Geschichte Schwarzer Menschen und People of Color in den Niederlanden.

**Julia Holzmann**, geb. 1983, lebt in Berlin und forscht zu Sklaverei und Black History. Ihre\* Forschungsschwerpunkte sind die Analyse von Macht- und Herrschaftsverhältnissen und Formen (historischer) Marginalisierungsstrategien und Diskriminierungen. Migrationsgeschichte, Globalgeschichte, Frauen\*, Queer- und Geschlechtergeschichte, Selbstzeugnisforschung sowie die Analyse von Rassismen, und intersektionale Mechanismen der Ausgrenzung gehören ebenfalls zu ihrem\* Forschungsfeld.

Weitere Informationen und Bestellung unter:  
[www.transcript-verlag.de/978-3-8376-5886-6](http://www.transcript-verlag.de/978-3-8376-5886-6)

# Inhalt

---

|                                    |    |
|------------------------------------|----|
| <b>Abkürzungsverzeichnis</b> ..... | 11 |
| <b>Abbildungen</b> .....           | 13 |
| <b>1. Einleitung</b> .....         | 15 |
| 1.1 Forschungsstand .....          | 23 |
| 1.2 Erkenntnisinteresse .....      | 41 |
| 1.3 Historisches Material .....    | 42 |
| 1.4 Methode .....                  | 50 |
| 1.5 Aufbau .....                   | 55 |

## Erster Teil

|                                                                                                                   |     |
|-------------------------------------------------------------------------------------------------------------------|-----|
| <b>2 Rechtsnormen – (Anti-)Sklavereigesetze?</b> .....                                                            | 61  |
| 2.1 Grundlagen des römisch-niederländischen Rechtssystems .....                                                   | 61  |
| 2.2 Tradierte Auseinandersetzungen mit Sklaverei im praktizierten Recht der<br>sieben vereinigten Provinzen ..... | 88  |
| 2.3 »Plakaat, concerneerde de vryheid der Slaaven« von 1776 (Plakaat 1776) .....                                  | 93  |
| 2.4 Manumission in der niederländischen Republik .....                                                            | 134 |
| 2.5 Abolition und Verbot der Sklaverei in den Niederlanden .....                                                  | 161 |

## Zweiter Teil

|                                              |     |
|----------------------------------------------|-----|
| <b>3 Biografische Mikrostudien</b> .....     | 171 |
| 3.1 Anthonij van Bengalen .....              | 171 |
| 3.2 Christina .....                          | 209 |
| 3.3 Marijtje Criool und Jacoba Leiland ..... | 244 |
| <b>4 Schluss</b> .....                       | 267 |
| 4.1 Definitionen .....                       | 269 |

|          |                                                    |            |
|----------|----------------------------------------------------|------------|
| 4.2      | Sklaverei im niederländischen Recht .....          | 275        |
| 4.3      | Manumission in der niederländischen Republik ..... | 277        |
| 4.4      | Biografische Mikrostudien .....                    | 279        |
| 4.5      | Die Funktion der Rassifizierungen .....            | 282        |
| <b>5</b> | <b>Anhang .....</b>                                | <b>287</b> |
| <b>6</b> | <b>Bibliographie .....</b>                         | <b>291</b> |

# 1. Einleitung

---

»Die Staaten Generaal der vereinigten Niederlande, allen denjenigen, die dieses sehen, hören oder lesen sollten; Salut, sollen wissen: dass wie sehr die sittliche Ausrichtung dieser Landen eine unanzweifelbare Wahrheit ist, dass in denselben Landen der Unterschied zwischen FREIEN und UNFREIEN Personen seit etlichen Jahrhunderten aufgehoben ist und alle Sklaverei außer Kraft gesetzt ist, sodann, dass alle Menschen hierzulande für FREIE Leute erkannt und gehalten werden, die zuvor genannte Wahrheit kann jedoch nicht in allen Hinsichten zutreffend gemacht werden, nicht bei Neger- und anderen Sklaven, welche aus den Kolonien dieses Staates nach diesen Landen herübergebracht oder herübergesandt werden [...]«.<sup>1</sup>

Dieses Zitat entstammt dem am 23. Mai 1776 in der Republik der Vereinigten Sieben Provinzen der Niederlande erlassenen *Plakaat, concerneerde de vryheid der Slaaven* (»Gesetz, betreffend die Freiheit der Sklaven« im Folgenden *Plakaat 1776* genannt). Urheber dieses *Plakaat 1776* waren die *Staten-Generaal*, die unter anderem für alle auswärtigen Angelegenheiten und die der Kolonien in der Republik zuständig waren. Nach einem allgemeinen Gruß an alle Personen, die das *Plakaat 1776* »sehen, hören oder lesen«, wird darauf hingewiesen, dass es bereits seit Jahrhunderten

---

1 SAA, 5028, 544N, Scans SUR100210000002. »De Staaten Generaal der vereenigde Nederlanden, alle de geenen die deese sullen sien of hooren leesen, salut; doen te weeten: dat hoe seer het volgens de seedelyke gesteldheid deeser Landen, eene ontwyffelbaare waarheid is, dat in deselve Landen het onderscheid tusschen VRYE en ONVRYE Persoonen al sedeert verscheide Eeuwen heeft opgehouden, en de Slavernye gecesseert is, soodanig dat alle Menschen hier te Landen voor VRYE Luiden erkent en gehouden worden, de voorsz waarheid egter niet in alle opsigten toepasselyk gemaakt kan worden op de Neeger- en andere Slaaven, welke uit de Colonien van den Staat na deese Landen overgebracht of overgezonden worden [...]« Die deutschen Übersetzungen der niederländischen Quellenzitate wurden von der Autorin\* angefertigt. Eigennamen, Titel etc. wurden nicht übersetzt. Alle Änderungen der Autorin\* werden durch eckige Klammern angezeigt. Die Übersetzung erfolgte behutsam und ist möglichst nah an den mittelniederländischen Quellen gehalten. Eine niederländische Transkription des jeweils zitierten Textes kann in der dazugehörigen Anmerkung eingesehen werden. Eine vollständige Übersetzung des *Plakaat 1776* findet sich im Anhang.

keine Sklaverei mehr in der Republik gebe und dass alle Menschen, die in den Niederlanden lebten, als frei gelten. Diese scheinbar universale Freiheit hat ihren Ursprung im *Plakaat van Verlatinge*. Mit dem 1581 veröffentlichten *Plakaat van Verlatinge* wiesen die führenden Politiker der Sieben Vereinigten Provinzen der Niederlande den Herrschaftsanspruch des spanisch-habsburgischen Königs Philip II. zurück. Wie »ein Vater seine Kinder und ein Hirte seine Schafe« solle ein Herrscher seine Untertanen schützen.

»Wenn er das nicht tut, sondern, anstatt seine Untertanen zu beschirmen, versucht, sie zu unterdrücken, übermäßig zu belasten, sie ihrer Freiheit, Privilegien und alten Gewohnheiten zu berauben und sie als Sklaven zu befehligen und zu gebrauchen, muss er nicht als ein Fürst, sondern als ein Tyrann angesehen werden.«<sup>2</sup>

Philip II. wurden also Tyrannei und Unterdrückung sowie die Versklavung der niederländischen Bevölkerung vorgeworfen.

Jene universale Freiheit für alle Niederländer\*innen, die also gegen Philip II. verteidigt wurde, wird in obigem Zitat des *Plakaat 1776* jedoch eingeschränkt, denn für »Neger und andere Sklaven«, die aus den niederländischen Kolonien in die Republik gebracht wurden, sollte sie in weiten Teilen nicht gelten.<sup>3</sup> Das *Plakaat 1776*

2 Zitiert nach Stephan Laux, Das »Plakaat van Verlatinge« (1581). Die niederländischen Generalstaaten, die Souveränitätsfrage und das Problem des quasi-säkularen Widerstandsrechts, in: Gerhard Rehm (Hg.), Adel, Reformation und Stadt am Niederrhein (= Studien zur Regionalgeschichte, Bd. 23), Bielefeld: Verlag für Regionalgeschichte, 2009, S. 169-189, hier: S. 179. In der niederländischen Forschung ist das *plakaat* hinlänglich bekannt, weshalb hier auf eine originalsprachliche Zitation verzichtet wird. Das Original befindet sich im Nationaal Archief Den Haag (NA), 1.01.01.01 Regeringsarchieven Geünieerde Provinciën I, Inv. 254G.

3 Der Sprachgebrauch der Zeitgenoss\*innen des 18. Jahrhunderts wird in dieser Studie nur als zu analysierender Gegenstand reproduziert. Wenn also von »negern«, »slaven« (»Sklaven«) etc. die Rede ist, dann handelt es sich um Quellenbegriffe, die in ihrer Wortbedeutung an der entsprechenden Stelle relevant sind. In den analytischen Ausführungen werden Begriffe wie »versklavte Person« oder »versklavte Menschen« verwendet, sofern der Aspekt der Sklaverei im Vordergrund steht, und »Schwarze Menschen/Personen« oder »People of Color«, wenn Rassifizierungen und die Kategorie Hautfarbe als Marker der Versklavung zentral sind. In Anlehnung an die Ausführungen von Natasha A. Kelly werden folgende Schreib- und Bedeutungsweisen gewählt: »Schwarz« als sozialpolitische Kategorie, die erst durch Rassismus entstanden ist; »People of Color« als gruppenbezogene Selbstdefinition und *weiß* als Kategorie zur Analyse von Herrschafts- und Machtverhältnissen. Vgl. Natasha A. Kelly (Hg.), Schwarzer Feminismus: Grundlagentexte, Münster: Unrast, 2019, S. 15-16. Im Hinblick auf eine inkludierende bzw. geschlechtersensible Sprache wird das Gendersternchen (\*) eingesetzt. Schreibweisen wie »Autor\*in« und »Sklav\*inneneigner\*innen« zeigen an, dass hier alle Geschlechter des Spektrums inkludiert und mitgedacht sind. Auch bei einzelnen Personen wird mit dem Gendersternchen gearbeitet, um den Betreffenden keine Geschlechtsidentität von außen zuzuschreiben. Das koloniale System hat etwaige von der kolonialen Norm abweichende

formuliert in acht Paragraphen die Konditionen, die für den Erhalt des Sklav\*innenstatus einer Person oder für deren Freiheit grundlegend waren. Es wird kein Grund genannt für die Rassifizierung und den rassistischen Ausschluss von zuvor als universell formulierten Freiheitsrechten. Ziel des *Plakaat 1776* war es, eine Rechtsbasis zu schaffen, die den Eigner\*innen von versklavten Menschen aus den westindischen Kolonien den Schutz ihres Eigentums und damit die Aufrechterhaltung der Versklavung ermöglichte.

Ebenfalls im Widerspruch zu der republikanischen, freiheitlichen Idee standen in der Frühen Neuzeit das Denken und die Herrschaft in den niederländischen Kolonien. Die Versklavung von zuvor in die Kolonien verschleppten Menschen wurde durch *plakaate* (Gesetze) und eine entsprechende Rechtsprechung abgesichert und legalisiert. In den *West Indies*, den Territorien der *Geotroyeerde Westindische Compagnie* (WIC) in der Karibik<sup>4</sup>, in »Niederländisch-Guyana«<sup>5</sup> in Südamerika und

---

Vorstellungen der versklavten Menschen von Geschlecht und Identität marginalisiert. Dieser Mechanismus soll in dieser Untersuchung nicht reproduziert werden. Nur Namen, typische Berufsbezeichnungen (z.B. Matrose, Dienstmädchen) und offizielle Titel, etwa »Staten-Generaal« oder »Landesadvokaten«, erhalten kein Gendersternchen, weil dies ein anachronistischer Eingriff wäre. Zudem lässt uns Hugo Grotius in *Inleydinge tot de Hollandsche Rechtsgelertheit*, Amsterdam: Dirk Boom, 1767, I., III., § 6 wissen, welche menschlichen Wesen er zu den »Geborenen Menschen« zählt: »Geborene Menschen sind Männer oder Weiber: Denn die man Mann-Weiber\* nennt, werden an die eine oder die andere Seite gerechnet nach der Art, die in ihnen überwiegt. \*Hermaphroditi oder Androgyni«. Grotius und seine Zeitgenoss\*innen kannten neben den bipolaren Geschlechtsidentitäten männliche und weibliche Identitäten und körperliche Beschaffenheiten, die zwischen oder außerhalb dieser Polarität lagen. Da das Rechtssystem jedoch polar konzipiert war, mussten sich Personen, die außerhalb dieses Systems verortet wurden, einer der beiden polaren Kategorien zuordnen. Mit Erreichen der Volljährigkeit und damit der Erlangung der Rechtsfähigkeit sollten diese Personen eine der rechtlichen und sozialen Kategorien wählen. Damit konnten alle als *geborene Menschen* angesehenen Personen rechtlich erfasst und behandelt werden. Nicht als Menschen galten Grotius jene, die als »Monstra« bezeichnet wurden. Vgl. ebd., § 5. Neben diesen Besonderheiten habe ich versucht, meinen eigenen Sprachgebrauch zu reflektieren und die Verhältnisse so präzise wie möglich zu benennen, so dass z.B. der Begriff »Sklavenreise« für den Transport im Sklavenschiff durch »Verschleppung« oder »Sklavenhalter« durch »Sklav\*inneneigner\*in« ersetzt wird. Zum Begriff des\*der Eigners\*in ist anzumerken, dass er zum einen als »Eigner« oder »Eignerin« im historischen Material selbst anzutreffen ist und zum anderen – und das ist auch der Grund, warum er in den Quellen verwendet wurde – anzeigt, dass ein\*e Eigner\*in Eigentumsrechte hatte. Beim Sprechen über versklavte Menschen geht es um deren Verortung als Eigentum. Das bedeutet, dass ein\*e Eigner\*in verkaufen, verschenken, bestrafen und töten durfte, da er\*sie über sein\*ihr Eigentum verfügte. Ein\*e Besitzer\*in hatte nur Besitzrechte, die durch das Zahlen von Miete oder eine Gefälligkeit erworben wurden. Sie beinhalteten aber nicht, dass das Eigentum einer anderen Person verkauft, verschenkt oder getötet werden durfte.

4 Aruba, Bonaire, Curaçao, Saba, Sint Eustatius, Sint Maarten.

5 Essequibo, Demerara, Berbice, Suriname.

in den Ost Indies, den Territorien der *Vereenigde Oostindische Compagnie* (VOC) in Südafrika<sup>6</sup>, Indonesien<sup>7</sup> und Indien<sup>8</sup> war Sklaverei weit verbreitet und legal. Die versklavten Menschen im Territorium der VOC wurden in erster Linie aus den umliegenden Regionen oder aus der Region Ostafrika verschleppt. In den Territorien der WIC wurden Menschen versklavt, die überwiegend von der Westküste Afrikas stammten oder lokalen indigenen Bevölkerungsgruppen angehörten. Kehrtren Kolonist\*innen in die niederländische Republik zurück, ließen sie sich häufig von versklavten Menschen begleiten, die auf der Schiffsreise für Komfort und Bedienung sorgen mussten. Die versklavten Diener\*innen sollten nach der Ankunft in der Republik zurück in die jeweilige Kolonie gesandt werden, doch viele Funktionäre der Handelskompanien setzten sich über diese Anordnung hinweg. Die Anwesenheit der versklavten Menschen in der Republik, in der keine Sklaverei praktiziert werden sollte, führte im 18. Jahrhundert zu teils heftigen Konflikten. Diese Konflikte resultierten daraus, dass aus den Kolonien mitgeführte Menschen sich auf verschiedene Weise aus der Sklaverei zu befreien versuchten.<sup>9</sup> Anfang der 1770er Jahre spitzte sich die Situation zu, bis am 23. Mai 1776 schließlich das *Plakaat 1776* erlassen wurde.

Diese Zweigleisigkeit der Argumentation über eine angeblich universale Freiheit und der zeitgleich praktizierten Sklaverei, die im Zitat des *Plakaat 1776* erkennbar ist, steht im Zentrum der vorliegenden Untersuchung. Dabei interessiert auch der Zusammenhang zwischen der im *Plakaat 1776* ausgedrückten rechtlichen Unterscheidung und den zeitgenössischen Rassifizierungen in den Niederlanden und seinen Kolonien. Der Kern des Problems, das dabei zum Ausdruck gebracht wird,

---

6 Kap der Guten Hoffnung. Dieser Teil des Territoriums der VOC ist in dieser Studie aufgrund der geografischen Lage weit ab vom indonesischen Raum nicht mitgemeint, wenn von den East Indies oder Ostindien die Rede ist. Das Kap der Guten Hoffnung wird immer explizit genannt.

7 Batavia (heute Java), Sumatra, Borneo (heute Kalimantan), Celebes (heute Sulawesi), Neu Guinea/Irian Jaya, die Inselgruppe Molukken, Ceylon (heute Sri Lanka).

8 Bengalen sowie Pulicat und Sadras an der Koromandalküste.

9 Vergleichbare Situationen sind auch in anderen europäischen Ländern festzustellen. Die Ambivalenz von fehlender rechtlicher Norm in Bezug auf Sklaverei und der gleichzeitigen Anwesenheit versklavter Menschen führte zu einer ganzen Reihe verschiedener Praktiken in der Sprache über Sklaverei, im Transfer von versklavten Menschen und auch in deren Behandlung und der Definition ihres Sklavenstatus. Für die Situation im Heiligen Römischen Reich deutscher Nation vgl. Rebekka von Mallinckrodt, *Verhandelte (Un-)Freiheit, Sklaverei, Leibeigenschaft und innereuropäischer Wissenstransfer am Ausgang des 18. Jahrhunderts*, in: *Geschichte und Gesellschaft*, 43 (2017) 3, S. 347–380. Von Mallinckrodt weist nach, dass der Status *versklavt* im Rechtssystem nicht vorhanden sein musste, um dennoch den Verkauf einer versklavten Person rechtlich abzusichern oder deren Sklav\*innenstatus aufrechtzuerhalten, und dass diese Sklaverei verschiedene Formen und Handlungsmöglichkeiten für die Betroffenen in sich barg.



ist die Versklavung von Menschen aufgrund von Rassifizierungen in der niederländischen Republik während der gesamten Frühen Neuzeit. Auf der Basis willkürlicher Marker wie Aussehen, Herkunft oder Religion wurde diese Herrschaft mittels komplexer Rechtsnormen zum Zwecke der Gewinnmaximierung gerechtfertigt. Zugleich hielt man weiter an der Idee fest, dass Sklaverei in der niederländischen Republik während der Frühen Neuzeit nicht existierte, wie es ja auch das *Plakaat van Verlatinge* proklamierte. Der in ihm ausgedrückte Freiheits- und Unabhängigkeitswille prägte als Utopie Politik, Gesellschaft und in weiten Teilen auch die nationale Geschichtsschreibung.<sup>10</sup> Die Vorstellung des *free-soil principle*, das persönliche Freiheit beim Betreten von niederländischem Boden versprach, und der nationale Gründungsmythos der Niederlande, der auf dem *Plakaat van Verlatinge* beruht, haben zu einem blinden Fleck in der nationalen Forschung geführt. Jahrzehntlang, während sich die Forschung mit Überlegungen über den Einfluss des *Plakaat van Verlatinge* auf die Amerikanische Unabhängigkeitserklärung, den Dreieckshandel, die *Atlantic Slavery*, den *Black Atlantic*, den *Dutch Atlantic*<sup>11</sup> etc. auseinandersetze, blendete sie zugleich aus, dass auch in der niederländischen Republik durchaus Menschen versklavt worden sind und es Sklaverei gegeben hat. Susan Buck-Morss hat in *Hegel und Haiti* deutlich auf diesen blinden Fleck in der niederländischen und europäischen Geschichtsschreibung hingewiesen.<sup>12</sup> In der vorliegenden Studie werden daher Formen von Sklaverei in der Republik und rassistische Stereotypisierungen<sup>13</sup>, mit denen versklavte und freie Schwarze Menschen und

- 
- 10 Vgl. hierzu z.B. die Homepage des New Netherlands Institute. Siehe auch Stephen E. Lucas, *The Plakkaat van Verlatinge: A Neglected Model of the American Declaration of Independence*, in: Rosemarijn Hoeffte, Johanna C. Kardus (Hg.), *Connecting Cultures: The Netherlands in Five Centuries of Transatlantic Exchange*, Amsterdam: VU University Press, 1994, S. 189-207.
- 11 Vgl. Gert Oostindie, Jessica V. Roitman (Hg.), *Dutch Atlantic Connections, 1680-1800. Linking Empires, Bridging Borders*, Leiden: Brill, 2014.
- 12 Susan Buck-Morss, *Hegel und Haiti*, in: Dies., *Hegel und Haiti. Für eine neue Universalgeschichte*, Berlin: Suhrkamp, 2011, S. 40-106, hier: S. 42-46.
- 13 Eine systemische Definition von Rassismus stammt von Max Sebastián Hering Torres und Helmut Bley, die betonen, dass »Rassen« durch Menschen konstruierte Kategorien sind und keine biologische Grundlage besitzen. »Sie entspringen somit menschlichen Vorstellungswelten und sind letztlich topische Sinnkonstruktionen. R[assismus] ist sowohl eine soziale Praxis als auch eine machtgeladene diskursive Konstruktion. [...] Rassismus ist [...] eine Strategie, mittels derer Unterschiede naturalisiert werden (Alterität); er operiert als ein Werkzeug des Vorurteils und der Stereotypen- und ›Sündenbocktheorien«, um bestimmte Gruppen zu unterdrücken oder auszubeuten und ihnen den Zugang zu materiellen oder natürlichen Ressourcen, Arbeit oder Rechten zu verwehren (Feindbild). Folglich ist R. ein Prozess der Entmenschlichung sowie der Inferiorisierung, impliziert Machtasymmetrien und ist ein Mittel zur Rechtfertigung von Vorherrschaft (Ungleichheit).« Max Sebastián Hering Torres, Helmut Bley, »Rassismus«, in: Friedrich Jaeger (Hg.), *Enzyklopädie der Neuzeit*, Bd. 10, Heidelberg: J.B. Metzler, 2009, Sp. 607-619. Zur Abgrenzung des Konzept von *Race* Albert Atkin, *Race, Definition, and Science*, in: Naomi Zack (Hg.), *The Oxford Handbook of Philosophy*

People of Color konfrontiert waren, anhand von Analysen unterschiedlicher historischer Quellen aus niederländischen Archiven verhandelt. Für eine erste Orientierung hinsichtlich der Frage, was unter Sklaverei und der Versklavung von Menschen aus Sicht der Geschichtswissenschaft zu verstehen ist, wird an dieser Stelle eine »systemische Definition« nach Michael Zeuske eingeführt. Von Sklaverei kann demnach die Rede sein:

- Wenn eine Person von Gewalt (*coercion*) und Zwang (*violence*) auf körperlicher, psychischer, struktureller und symbolischer Ebene betroffen ist.
- Wenn ein asymmetrisches Abhängigkeitsverhältnis und eine
- Verfügung über den Körper und die Arbeits- und ggf. Reproduktionskraft der Person durch eine andere Person besteht.
- Wenn eine Statusdegradierung und eine
- Initiierung in den Sklavenstatus (z.B. Brandzeichen, Handauflegen) stattgefunden haben.
- Wenn Sklaverei je nach Grad der Institutionalisierung gemäß rechtlichen Normierungen oder informellen Regeln erfolgt.
- Zudem kann ein Eigentumsverhältnis vorliegen, das dem\*der Eigner\*in Rechtssicherheit bei der Ausübung der Verfügungsgewalt über die versklavte Person bietet. *Legal ownership*, also die rechtlich fundierte Eigner\*innenschaft über eine versklavte Person, wird heute jedoch nicht mehr als zentrales Element bei der Einordnung verschiedener Formen von Sklaverei angesehen, da es eine Reihe informeller Formen der Versklavung gibt und gab. Die in Europa bekannte sogenannte *harte Leibeigenschaft* kann demnach als lokale Form von Sklaverei angesehen werden.<sup>14</sup>

---

and Race, Oxford: University Press, 2017, S. 135-138. Albert Mosely, »Race« in Eighteenth- and Nineteenth-Century Discourse by Africans in the Diaspora, in: Naomi Zack (Hg.), The Oxford Handbook of Philosophy and Race, Oxford: University Press, 2017, S. 81-90.

14 Vgl. Michael Zeuske, Handbuch Geschichte der Sklaverei: Eine Globalgeschichte von den Anfängen bis zur Gegenwart, Bd. 1, 2., überarb. u. erw. Aufl., Berlin, Boston: De Gruyter, 2019, S. 193-265, insb.: S. 206-221. Zeuske geht in seinem Artikel *Sklaverei* in der *Enzyklopädie der Neuzeit* darauf ein, dass es kaum möglich ist, eine Definition von Sklaverei zu erarbeiten, die alle weltweit vorkommenden Formen von Sklaverei erfasst. Daher ist Zeuske dazu übergegangen von Sklaverei(en) zu sprechen, um herauszustellen, dass es viele Formen der Versklavung gibt. Vgl. Michael Zeuske, Stefan Reichmuth, »Sklaverei«, in: *Enzyklopädie der Neuzeit Online*, doi: [http://dx.doi.org/10.1163/2352-0248\\_edn\\_COM\\_350332](http://dx.doi.org/10.1163/2352-0248_edn_COM_350332). In dieser Studie wird ebenfalls der Begriff *Sklavereien* verwendet, was als Anlehnung an Zeuskes Sklaverei(en) zu verstehen ist. Eine deutlich enger gefasste und für die Sklavereiforschung sehr prägende Definition ist jene, die Orlando Patterson 1982 vorgeschlagen hat: »[S]lavery is the permanent, violent domination of natively alienated and generally dishonored persons.« *Natally alienation* bezeichnet nach Patterson die Isolierung und das Herausgerissensein verschleppter und versklavter Personen aus dem sozialen und familiären Netz, in das sie geboren wurden. Zudem

Ziel der Untersuchung ist zum einen, eine zeitgenössische und den niederländisch-republikanischen Verhältnissen entsprechende, detaillierte Definition von Sklaverei vorzulegen. Die spezifischen Logiken der rechtlichen Narrationen, mit denen der Erhalt und Transfer von Versklavung und Ausbeutung sowie die Verschleppung der versklavten Personen gerechtfertigt wurden, sollen fassbar gemacht werden. Es geht also darum, die Praktiken der Versklavung sowie die dahinterliegenden Strategien herauszuarbeiten und damit die spezifische Beschaffenheit der verschiedenen Formen von Sklaverei in der niederländischen Republik sichtbar zu machen.<sup>15</sup> Hierbei werden zur Kontextualisierung auch rassistische Stereotypisierungen und Praktiken, die den Hintergrund dafür bildeten, dass die spezifische Kombination aus *free-soil principle* und geduldeter Sklaverei in Europa möglich war, mit einbezogen. Zum anderen sollen anhand von drei biografischen Mikrostudien von People of Color aus niederländischen Kolonien Praktiken und Handlungsmöglichkeiten jener Personen sichtbar gemacht werden, die in der niederländischen Republik mit Sklaverei, Rassifizierungen und rassifizierenden Stereotypen konfrontiert waren bzw. tatsächlich versklavt wurden.

Das Thema hat, obwohl der Berichtszeitraum dieser Untersuchung im langen 18. Jahrhundert<sup>16</sup> liegt, höchste Aktualität: Denken lässt sich hier etwa an die Forderung von Nachkomm\*innen der versklavten Menschen nach Entschädigungszahlungen für erlittenes Unrecht ihrer Vorfahr\*innen<sup>17</sup>, oder an die Forderung,

---

bezieht Patterson die Zerstörung der historisch-sozialen Eingebundenheit dieser Personen in seine Definition ein. Orlando Patterson, *Slavery and Social Death. A Comparative Study*, Cambridge (MA), London: Harvard University Press, 1982, S. 7, 13.

15 Vgl. Joseph C. Miller, *The Problem of Slavery in History. A Global Approach*, New Haven, London: Yale University Press, 2012, S. 2.

16 *Das lange 18. Jahrhundert* bezeichnet in dieser Studie den Zeitraum von etwa 1680 bis ca. 1830. Das Jahr 1680 markiert dabei den Zeitpunkt, zu dem alle in dieser Studie einbezogenen Territorien von den Niederlanden erobert waren und die koloniale Herrschaft dort etabliert war. Ab da galt es aus Perspektive der Kolonisator\*innen also, die Herrschaft über die Territorien und besonders über die versklavten Menschen zu festigen und aufrechtzuerhalten. Gegen Ende des 18. Jahrhunderts begann in europäischen Gesellschaften die Legitimität der Versklavung zu bröckeln, was durch die Revolutionen (französische, amerikanische und haitianische) noch verstärkt wurde. 1814 wurde zunächst der niederländische Handel mit versklavten Menschen und 1838 die Sklaverei in der niederländischen Metropole verboten, 1861/63 folgte dann die Abschaffung der Sklaverei auch in den niederländischen Kolonien. Die untersuchte Zeitspanne stellt damit die entscheidende Phase in der historisch-politischen frühen Kolonial- und Sklavereigeschichte und der ideengeschichtlichen und sozialpolitischen Entwicklungen in Hinblick auf Sklaverei in der Republik dar.

17 Vgl. Stephen Small, Sandew Hira, 20 Questions and Answers about Dutch Slavery and its Legacy (= *Decolonizing the Mind*, Bd. 1), Den Haag: Amrit, 2014, S. 68-72. Han van der Horst, Persoonlijk compenseren nazaten van slaven slecht idee, in: Joop: opinie, 13.4.2019, <https://joop.p.bnnvara.nl/opinies/persoonlijk-compenseren-nazaten-van-slaven-slecht-idee> (22.08.2019).

Rassismus zu dekonstruieren und aus dem Denken der Menschen und deren Alltag zu beseitigen. Die Dekolonisierung des öffentlichen Raums, der Politik, der kulturellen und wissensbildenden Institutionen und der Gesellschaften ist ein viel diskutiertes Anliegen.<sup>18</sup> In diesem Kontext ist ebenfalls die Debatte um Sinterklaas und *zwarte Piet*<sup>19</sup> zu verorten. Die Auseinandersetzung um den *zwarte Piet* wird mitunter so hitzig geführt, dass es zu gewalttätigen Konflikten kommt.<sup>20</sup> Mit dem Fest *Keti Koti*<sup>21</sup> wird in den Niederlanden der Abschaffung der Sklaverei in der ehemaligen niederländischen Kolonie Suriname gedacht.<sup>22</sup> Zuletzt wurde im Rembrandthuis in Amsterdam die Ausstellung *Black in Rembrandt's Time* eröffnet, bei der Bilder von niederländischen Maler\*innen des 17. Jahrhunderts ausgestellt werden, die als Motive Schwarze Menschen oder People of Color zeigen.<sup>23</sup> Genau wie

---

18 Vgl. Haro Kraak im Interview mit Elma Drayer, »Ik zie een groeiende apartheid, je sluit je weer op met je eigen clubje«, in: De Volkskrant, 8.8.2019, [https://www.volkskrant.nl/cultuur-media/ik-zie-een-groeiende-apartheid-je-sluit-je-weer-op-met-je-eigen-clubje~be9c7ded/\(22.08.2019\)](https://www.volkskrant.nl/cultuur-media/ik-zie-een-groeiende-apartheid-je-sluit-je-weer-op-met-je-eigen-clubje~be9c7ded/(22.08.2019)). Gloria Wekker, *White Innocence: Paradoxes of Colonialism and Race*, Durham: Duke University Press, 2016; zu Wekker siehe Esther Helena Arens, Rezension zu: Wekker, Gloria: *White Innocence. Paradoxes of Colonialism and Race*, Durham 2016. ISBN 978-0-8223-6075-9, in: H-Soz-Kult, 11.05.2017, [www.hsozkult.de/publicationreview/id/reb-24625](http://www.hsozkult.de/publicationreview/id/reb-24625) (23.03.2020).

19 Sinterklaas ist das niederländische Pendant zum deutschen Hl. Nikolaus, sein Süßigkeiten (*snoepjes* und *suiker dieren*/Zuckertierchen) verteilender Gehilfe – als Pendant zu Knecht Ruprecht – ist der *zwarte Piet*, eine Person, die als Sklave gelesen wird und bei deren performativer Darstellung auf Umzügen und sonstigen Veranstaltungen oft Blackfacing eingesetzt wird. Jedes Jahr aufs Neue kommt es aufgrund der rassistischen Blackfacing-Praxis und des unreflektierten Umgangs mit der kolonialen Vergangenheit zu heftigen verbalen, zum Teil auch gewalttätigen Auseinandersetzungen und entbrennt in den Printmedien eine hitzige Debatte um den *zwarte Piet*. In den letzten Jahren wurde versucht, dem *zwarte Piet* einige bunte Piets, also Personen, die Gesicht und Hände nicht schwarz, sondern grün oder blau angemalt haben, zur Seite zu stellen, um die Situation zu entschärfen. Auch werden inzwischen entsprechend bunte Spielzeugpüppchen und Lebkuchenfiguren verkauft.

20 Vgl. Han van der Horst over geschiedenis en toekomst van Zwarte Piet (Audio-Interview von Franciso van Jole), in: Joop: Nieuws, 24.11.2018, <https://joop.bnnvara.nl/nieuws/han-van-der-horst-over-geschiedenis-en-toekomst-van-zwarte-piet> (22.08.2019).

21 »Keti Koti« bedeutet »Ketten sprengen« und stammt aus dem Sranan Tongo, der Kreolsprache, die die versklavte Bevölkerung in Suriname in der Frühen Neuzeit entwickelte.

22 Vgl. Alex van Stipriaan, *Between Diaspora, (Trans)Nationalism and American Globalization. A History of Afro-Surinamese Emancipation Day*, in: Ruben S. Gowricharn (Hg.), *Caribbean Transnationalism: Migration, Pluralization, and Social Cohesion*, Lanham u.a.: Lexington Books, 2006, S. 155-178. Alles wat je moet weten over bevrijdingsfeest Keti Koti, in: NU.nl, 1.7.2019, [www.nu.nl/dvn/5958227/alles-wat-je-moet-weten-over-bevrijdingsfeest-keti-koti.html?fbclid=IwARoLDCRtPvR6l3krhgj6FJ4aTVQuSjsr7swXY9iv-vhd2r3vOktc8Ao9Zs](http://www.nu.nl/dvn/5958227/alles-wat-je-moet-weten-over-bevrijdingsfeest-keti-koti.html?fbclid=IwARoLDCRtPvR6l3krhgj6FJ4aTVQuSjsr7swXY9iv-vhd2r3vOktc8Ao9Zs) (22.08.2019).

23 Siehe die Homepage des Rembrandthuis in Amsterdam, in dem die Schau vom 6. März bis zum 31. Mai 2020 zu sehen war, <https://www.rembrandthuis.nl/wp-content/uploads/2020/02>

die Aufrechterhaltung der Versklavung von Menschen im langen 18. Jahrhundert auch in der niederländischen Metropole stattgefunden hat, so finden auch heute diese Auseinandersetzungen in den Niederlanden statt. Die gegenwärtigen, oft emotional geführten und polarisierenden Debatten finden im historischen Schatten des niederländischen Kolonialismus, des niederländischen Menschenhandels mit Afrikaner\*innen und der Verschleppung von versklavten Menschen in die niederländische Republik statt.

In dieser Studie wird den Leben der verschleppten und gegebenenfalls versklavten Schwarzen Menschen und People of Color nachgespürt, die unter Zwang in die Republik gebracht wurden oder auch freiwillig mitkamen. Es wird analysiert, wie es diesen Menschen gelang, im Geflecht der Rechtssysteme, der asymmetrischen Herrschaftsverhältnisse, der begrenzten Handlungsmöglichkeiten und zumindest anfänglicher Fremdheit in einer unbekannten Gesellschaft zu navigieren, sich zurechtzufinden und ihr Leben dort zu meistern. Ihre Lebenswelten<sup>24</sup> werden sichtbar gemacht. Die Territorien der Sieben Vereinigten Provinzen der Niederlande bilden als Herrschaftsgebiete den rechtlichen Rahmen, das Normensystem, mit dem die Praktiken und Handlungslogiken der Menschen zueinander ins Verhältnis gesetzt werden.

## 1.1 Forschungsstand

Die erste konkrete Untersuchung über versklavte Schwarze Menschen und People of Color in der niederländischen Republik wurde 1963 von R. Buvé vorgelegt.<sup>25</sup> Mitte der 1980er folgte eine weitere, grundlegende Studie von Gerd Oostindie und

---

/press-release.-here-black-in-rembrandts-time.-the-rembrandt-house-museum-amsterdam.pdf (12.10.2021).

- 24 Vgl. zum Begriff der Lebenswelt Alf Lüdtke, *Lebenswelt: verriegelte Welt? Überlegungen zu einem Konzept und seinen Verwendungen*, in: *WerkstattGeschichte*, 75 (2017), S. 115-124. Lüdtke kritisiert, dass das ursprüngliche Konzept der Lebenswelt zu statisch gedacht sei, wobei er auch feststellt, dass es in der Forschung weniger statisch gebraucht werde. Er schlägt vor, den Begriff Lebenswelt durch den des Milieus zu ersetzen. Meines Erachtens bezieht das Milieu in Lüdtkes Sinn die Bedeutung von Rechtssystem und Normen nicht stark genug mit ein. Daher möchte ich den Begriff der Lebenswelt beibehalten, da er Rechtssystem und Normen ebenso einbezieht wie soziale Kreise (Simmel) oder Milieus. Georg Simmel, *Über soziale Differenzierung: Sociologische und psychologische Untersuchungen*, ND der Ausg. Leipzig 1890, Bad Feilnbach: Schmidt Periodicals, 1990.
- 25 Vgl. R. Buvé, *Surinaamse slaven en vrije negers in Amsterdam gedurende de achttiende eeuw*, in: *Bijdragen tot de Taal-, Land- en Volkenkunde*, 119 (1963)1, S. 8-17. 1984 hat Preedy eine weitere Studie vorgelegt: S. E. Preedy, *Negers in de Nederlanden, 1500-1863: Een waarschuwing en een aansporing*, Nijmegen: Masusa, 1984.

Emy Maduro, die auch heute noch Beachtung findet.<sup>26</sup> Gemeinsam haben die beiden Studien, dass sie unter anderem eine Übersicht geben über Schwarze Menschen und People of Color, die versklavt in die Republik kamen und deren Spuren im historischen Material zurückverfolgt werden können. Zudem stellen sie Überlegungen an zu Schiffspassagen, den Gründen ihrer Anwesenheit, der Dauer des Aufenthalts und auch zur Anzahl dieser Personengruppe. Der Schwerpunkt liegt hierbei auf Personen, die aus Suriname in den West Indies in die Niederlande kamen.<sup>27</sup> Aufbauend auf der Untersuchung von Buvé hat Oostindie mittels einer Auswertung der *Gouvernementsjournale* von Suriname für den Zeitraum zwischen 1729 und 1781 eine Schätzung zur Anzahl der versklavten Personen vorlegen können, die in die Republik verschleppt wurden oder freiwillig reisten.<sup>28</sup> Ergebnis der Auswertung ist, dass in der zweiten Hälfte des 18. Jahrhunderts deutlich mehr versklavte Menschen reisten als in der ersten. 656 versklavte Menschen seien im 18. Jahrhundert aus Suriname ausgereist, 627 im selben Zeitraum in Suriname eingereist.<sup>29</sup>

26 Vgl. Emy Maduro, Gerd Oostindie, In het land van de overherser, Antillianen in Nederland 1634/1667-1954, Dodrecht: Floris Publications, 1986.

27 Gert Oostindie, Kondreman in Bakrakondre: Surinamers in Nederland 1667-1954, in: Ders., Emy Maduro (Hg.), In het land van der overheerser. Antillianen en Surinamers in Nederland, 1634/1667-1954, Leiden: Brill, 1986, S. 1-132, hier: S. 6, [www.jstor.org/stable/10.1163/j.ctt1w8hono.5](http://www.jstor.org/stable/10.1163/j.ctt1w8hono.5) (17.03.2020). »In het eerste artikel dat over de geschiedenis van de Surinamers in Nederland verscheen, „Surinaamse slaven en vrije negers in Amsterdam« (1963), deed Buve verslag van zijn onderzoek in de archieven van de Gouverneurs van Suriname over de periode van 1729 tot 1749. Hij suggereert dat in de loop van de achttiende eeuw enkele honderden negers naar Amsterdam vertrokken. In de door hem onderzochte periode werden zo'n tachtig negers en enkele Indianen naar deze stad vervoerd, terwijl ongeveer hetzelfde aantal terugkeerde. Het min of meer overeenkomen van deze aantallen betekent niet dat het verblijf in Amsterdam altijd even lang duurde. Buve toont aan dat in de periode 1729-1737 een belangrijk vertrekoverschot vanuit Suriname bestond; in de periode 1743-1749 was het tegenovergestelde het geval. Het vertrek uit Paramaribo betrof respectievelijk 62 en 20, de terugreis 20 en 64 Surinamers. Verdere gegevens over dit personenverkeer zijn te vinden in de Journalen van de Gouverneurs van Suriname. Gebruik makend van een beschrijving daarvan voor de periode van 1729 tot 1781 kon ik de reizigersstroom reconstrueren. Dit onderzoek leidde tot opvallende resultaten, met name ten aanzien van de totale omvang van het personenverkeer in de drie decennia na 1750. [...] [Z]oals nog zal blijken zijn dit slechts minimale schattingen van de reizigersstroom.«

28 Auf die verschiedenen Nuancen von »freiwilliger« Reise und Verschleppung wird im Verlauf der Untersuchung an Beispielen eingegangen. Eine versklavte Person konnte die strategische Entscheidung treffen, in die Republik zu reisen, um dort zu versuchen, ihre Freiheit zu erlangen.

29 Vgl. Oostindie, Kondreman, S. 6-9. Im Zeitraum 1729-1749 (wobei die Jahrgänge 1734/35, 1739-42 im *Gouvernementsjournal* fehlen) konnte Oostindie 87 versklavte Personen identifizieren. Für den Zeitraum 1749-1781 waren es 569 versklavte Personen. Nicht einkalkuliert sind Personen, deren Status z.B. aus Kostengründen falsch angegeben wurde (nicht nachprüfbar), oder Menschenmuggel. Da bei der Ankunft in der Republik keine flächendeckende, zentrale

Für alle anderen niederländischen Kolonien in West- und Ostindien gibt es für das lange 18. Jahrhundert keine Zahlen. Oostindie betont jedoch, dass die von ihm geschätzten Zahlen »minimal« seien, die tatsächliche Anzahl versklavter Personen in der Republik dürfte demnach weit höher gewesen sein.<sup>30</sup>

Hinsichtlich der Anwesenheit versklavter Personen in der Republik ist bei Oostindie, der sich intensiv mit Buvés Untersuchung auseinandergesetzt hat, zu lesen:

»Allmählich wird der Gebrauch von Sklaven in den Niederlanden immer problematischer. Buvé vermeldet den Fall des Sklaven Coridon, der, einmal in Amsterdam, meinte frei zu sein und auf eigene Kosten in den Dienst des Preußischen Gesandten eintrat. Dies spielte sich 1742 ab; Buvé nennt eine weitere Geschichte, die 30 Jahre später stattfand. 1772 erklärten die Staten-Generaal per Resolution eine Sklavin und ihre Töchter für frei, weil sie nach Amsterdam gebracht wurden. Hierauf warnte die Sociëteit van Suriname Gouverneur Nepveu, dass ›Sklaven durch oder mit Zustimmung ihrer Meister nach Europa gebracht ... dadurch vollkommen frei werden‹ [...].«<sup>31</sup>

Oostindie widerspricht dabei Buvés Einschätzung, dass versklavte Menschen, die in die Republik kamen, grundsätzlich frei wurden.

»Hieraus darf nicht geschlossen werden, dass die Sklaverei auf niederländischem Boden ab 1772 abgeschafft war. Das sollte noch viele Jahre dauern.«<sup>32</sup>

Während Buvé schreibt, dass das *free-soil principle* dazu führte, dass alle Menschen, die niederländischen Boden betraten, frei waren, sieht Oostindie deutliche Anzeichen dafür, dass dem nicht so war.

»Nach dem [...] Placaat van de Staaten Generaal, omtrent de Vryheid der Negeren andere Slaaven, welke uit de Colonien van den Staat naar dese Landen over-

---

Registrierung der einzelnen Personen vorgenommen wurde, gibt es keine Auskunft über die Personen, die in die Republik eingereist sind, und deren Status.

30 Vgl. ebd., S. 6.

31 Ebd., S. 14; Zitat im Zitat von Buvé. »Langzamerhand werd het gebruik van slaven in Nederland echter problematischer. Buve vermeldt het geval van de slaaf Coridon die, eenmaal in Amsterdam, meende vrij te zijn en op eigen houtje in dienst trad bij de Pruisische gezant. Dit speelde zich af in 1742; Buve noemt een verdergaan de geschiedenis die dertig jaar later plaatsvond. In 1772 verklaarde de Staten-Generaal bij resolutie een slavin en haar dochters vrij omdat die naar Amsterdam waren gebracht. Hierop waarschuwde de Sociëteit van Suriname gouverneur Nepveu dat 'slaaven door of met consent van hare meesters in Europa gebraght ... daardoor volkooome vrijheid bekoomen' [...].«

32 Ebd. »Hieruit mag niet de conclusie worden getrokken dat de slavernij op Nederlandse bodem vanaf 1772 was afgeschaft. Dit zou nog vele jaren duren.«

gebracht of overgesonden worden (23 mei 1776) [= Plakaat 1776] wird ein in die Niederlande gekommener Sklave nicht frei.«<sup>33</sup>

Trotz der starken Rezeption Oostindies hielt sich die Grundannahme des *free-soil principle* in der Forschung. So gehen etwa einige Aufsätze, die überwiegend Kurzbiografien<sup>34</sup> (anzunehmenderweise) ehemals versklavter Personen enthalten, sowie ein längerer Aufsatz von Jean Jaques Vrij zu drei (ehemals) versklavten Frauen\*, die alle 2001 veröffentlicht wurden, weiter von der Gültigkeit des *free-soil principle* aus.<sup>35</sup> Diese Aufsätze sind in regionalen genealogischen Zeitschriften oder in regionalhistorischen Sammelbänden publiziert worden.<sup>36</sup> Auch in den Untersuchungen über das Leben von Jacobus Capitein<sup>37</sup>, die einen eigenen kleinen Schwerpunkt

33 Ebd. »Volgens het hier afgedrukte Placaat van de Staaten Generaal, omtrent de Vryheid der Negeren en andere Slaaven, welke uit de Colonien van den Staat naar dese Landen overgebracht of overgesonden worden (23 mei 1776) werd een naar Nederland gekomen slaaf niet vrij.«

34 Vgl. Petronella J. C. Elema, Alloctonen van rond de evenaar. II.: Jan van Oost, in: HuppelDePup, 8 (2001) 2, S. 52-53. Dies., Alloctonen van rond de evenaar. III: Louis Alons, in: HuppelDePup, 9 (2001) 2, S. 47-49. Willem G. Doombos, Alloctonen van rond de evenaar. I.: Christiaan Maandag alias »zwarte Maandag«, in: HuppelDePup, 8 (2001) 1, S. 20-21.

35 Vgl. Jean Jacques Vrij, Susanna Dumion en twee van haar lotgenoten. Drie Afro-Westindische vrouwen in achttiende-eeuws Amsterdam, in: Wi Rutu, 15 (2015) 1, S. 18-31.

36 Vgl. J. J. Smedes, Rond Veenborg en Hooghout: kleine historie van Hoogezand en Sappemeer, Hoogezand/Sappemeer: De Librije, 1984, S. 72. Leonard Smid, Oud Hoogezand in woord en beeld, Hoogezand/Sappemeer: De Librije, 1974, S. 64, G. N. Schutter, Borgen en hofsteden in en om Hoogezand-Sappemeer, Hoogezand: Historische Vereniging Hoogezand-Sappemeer e.o., 1996, S. 117-121. Auf diese Publikationen haben mich niederländische Kolleg\*innen aufmerksam gemacht. Ein herzliches Dankeschön an dieser Stelle hierfür an Archivar Tede Smedes, J. P. A. Wortelboer, Petronella J. C. Elema, Harm Jan Frese, Koos Gräpner, Jaques Moerman und an Mark Ponte vom Stadsarchiv Amsterdam. Meinen Dank auch an Ineke Mok.

37 Jacobus Elias Johannes Capitein, ca. 1716 geboren, wurde als kleiner Junge\* an der afrikanischen Westküste (nahe dem St. Andrews River) von dem niederländischen Sklavenschiffskapitän Arnold Steenhardt gekidnappt, versklavt und Jacob van Goch, Generaldirektor der Westindischen Compagnie (WIC) in Westafrika, geschenkt. Er lebte u.a. im Fort Elmina, kam in die niederländische Republik und studierte dort Theologie in Leiden. 1742 legte er die Promotionsschrift *Dissertatio politica-theologica de servetute libertati christianae non contraria* (engl. Politico-theological dissertation on slavery as not being contrary to christian freedom) vor, wurde jedoch nicht promoviert. Capitein erläutert in dieser Schrift aus theologischer Perspektive, weshalb Sklaverei und Christentum nicht im Widerspruch stünden. Anschließend schickte man Capitein nach Elmina, wo er als Missionar und Lehrer arbeitete. Er bezahlte monatlich 100 Gulden an van Goch, seinen (vormaligen) Eigner. Die Bitte, eine Schwarze Frau\* aus der Gegend von Elmina heiraten zu dürfen, wurde ihm verwehrt, stattdessen sandte man die niederländische Waise Antonia Ginderdros, die er 1745 ehelichte. Capitein starb am 1. Februar 1747 in Elmina. Über sein Leben wurden einige Untersuchungen veröffentlicht. Vgl. z.B. David Nii Anum Kpobi, *Saga of a Slave. Jacobus Capitein of Holland and Elmina, Legon, Ghana: Cootek Limited, 2001. Ders., Mission in Chains. The Life, Theology and Ministry of*



innerhalb der niederländischen historischen Forschung bilden, wird von der Gültigkeit des *free-soil principle* ausgegangen.

Daneben gibt es einige populärwissenschaftliche Schriften, die ebenfalls davon ausgehen, dass das *free-soil principle* im langen 18. Jahrhundert die herrschende Praxis in den Niederlanden war. Gewöhnlich sind diese Publikationen von Historiker\*innen verfasst, die neue Erkenntnisse oder kürzlich erhobenes, bisher unbekanntes historisches Material in dieser Form vorlegen.<sup>38</sup> Dies gilt etwa für den 2017 erschienenen Band *Sporen van Slavernij in Leiden*, den Gert Oostindie und Karwan Fatah-Black herausgegeben haben. Trotz ihrer ausgewiesenen Fachkenntnisse suggerieren die Herausgeber darin, dass es keine Versklavung in der Republik gegeben habe. Im Prinzip widersprechen Oostindie und Fatah-Black damit Oostindies Befunden, die er 1986 in *Kondreman* veröffentlichte.<sup>39</sup> So ist in *Sporen van Slavernij in Leiden* zu lesen:

»Unternehmer, die ihr Geld verdienten mit Sklavenhandel und Sklaverei, hatten ihre Häuser und Betriebe in den Niederlanden. Von einigen sind die Besitzungen noch zurückzuverfolgen. Auch kamen Menschen aus Afrika und aus den Kolonien in die Niederlande, dann aber nicht als Sklaven.«<sup>40</sup>

Diese Feststellung ist umso überraschender, als im Buch selbst am Beispiel zweier im 18. Jahrhundert in den Niederlanden lebender Personen, Isaäcq und Claudina, eindeutige Hinweise auf langjährige Versklavung und sogar einen Besitztransfer

---

the Ex-Slave Jacobus E. J. Capitein (1717-1747) with a Translation of his Major Publications/ Zending in Boeien. Leven, theologie en ambtsbediening van het ex-slaaf Jacobus E. J. Capitein (1717-1747) met een vertaling van zijn belangrijkste werken, Zoetemeer: Uitgeverij Boekencentrum, 1993. Christine Leveq, Jacobus Capitein: Dutch Calvinist and Black Cosmopolitan, in: *Research in African Literatures*, 44 (2013) 4, S. 145-166. Henri van der Zee, 's Heeren Slaaf. Het dramatische leven van Jacobus Capitein, Amsterdam: Balans, 2001. André Capiteyn, Ivoorzwart. Hollands glorie en de slavenhandel in West-Afrika: »over de slaverny als niet strydig tegen de christelyke vryheid«, Gent: Stichting Mens en Kultuur, 2001.

38 Vgl. Gert Oostindie, Karwan Fatah-Black, *Sporen van Slavernij in Leiden*, Leiden: University Press, 2017. Bram Hoonhout, 1776. »Vrije grond« onbereikbaar voor slaven, in: Lex Heerma van Voss u.a. (Hg.), *Wereldgeschiedenis van Nederland*, Amsterdam: Ambo/Anthos, 2018, S. 323-328. Mark Ponte, Geweene Slavinnen, in: *Ons Amsterdam*, 71 (2019) 6, S. 42-43. Ders., 1656 Twee moeren in een stuk van Rembrandt, in: Lex Heerma van Voss u.a. (Hg.), *Wereldgeschiedenis van Nederland*, S. 256-269, hier: S. 267. Sofern eine neue, überzeugend argumentierte Erkenntnis ohne Quellennachweise vorgebracht wurde, habe ich die Autor\*innen kontaktiert und um die Verifizierung der Angaben gebeten. Da die Autor\*innen vom Fach sind, gehe ich davon aus, dass alle gemachten Angaben korrekt sind.

39 Vgl. Oostindie, *Kondreman*, S. 14.

40 Oostindie, *Sporen van Slavernij in Leiden*, S. 10. »Ondernemers die hun geld verdienen met slavenhandel en slavernij hadden huizen en bedrijven in Nederland. Van sommigen zijn hun bezittingen nog te traceren. Ook kwamen er mensen uit Afrika en uit de koloniën naar Nederland, al dan niet als slaaf.«

vorgelegt werden. Die Einordnung des historischen Materials ist jedoch indifferent und relativierend in Hinblick auf Sklaverei in der Republik. Isaäcq und Claudina wurden von Johanna Temming, der Ehefrau des *Oud Raad van Politie en Crimineele Justitie von Suriname* 1742 aus Suriname nach Den Haag gebracht. 1770 wurde von Temming in einem Testament festgelegt, dass Isaäcq bei ihrem Tod die Freiheit erlangen, aber weiter ihrem Mann zu Diensten sein sollte, Claudina hingegen sollte mit möglichen Kindern als Sklavin in den Besitz von Temmings Sohn übergehen. Es ist zu lesen:

»Der Haushalt bestand außer der ›freien Frau‹ Susanna aus dem ›Mulattenjungen‹ Isaäcq und dem ›Negermädchen‹ Claudina. 1770 ließ Johanna ein Testament aufsetzen worin sie Isaäcq, der inzwischen Zimmermann geworden war, nach ihrem Tod ›den Schatz der Freiheit‹ schenken, unter der Bedingung, dass er im Dienst ihres Mannes Etienne verblieb. Claudina sollte, mit eventuellen Kindern, Besitz von Henri Zachary werden. Sklaverei auf eigenem Boden war in der Republik der Vereinigten Niederlande umstritten und ein 1776 ausgestelltes plakaat machte strikte Vorgaben dazu: ein Sklave oder eine Sklavin aus der Karibik, der oder die länger als ein halbes Jahr in den Niederlanden verblieb, wurde im Prinzip frei. Johanna zog später nach Amsterdam, wo sie 1774 starb. So wie es im Testament festgelegt war, wurde Isaäcq für frei erklärt. Es ist unbekannt, was mit den anderen aus dem Leidener Haushalt geschah.«<sup>41</sup>

Untersuchungen, die versklavte Menschen aus den Kolonien in der Metropole nur am Rande behandeln, setzen sich nur selten kritisch mit dem *free-soil principle* auseinander.<sup>42</sup>

Die ältere Literatur zum Thema Sklaverei in den Niederlanden und zu niederländischem Kolonialismus wird in Teilen der jüngeren Forschung immer wieder

---

41 Oostindie, *Sporen van Slavernij in Leiden*, S. 23-24. »Het huishouden bestond behalve de ›vrije vrouw‹ Susanna uit de ›mulattenjongen‹ Isaäcq en het ›negermeisje‹ Claudina. In 1770 liet Johanna een testament opstellen waarin zij Isaäcq, die inmiddels timmerman was geworden, na haar dood ›de schat der vrijheid‹ schenkt, mits hij in dienst zou blijven bij haar man Etienne. Claudina zou, met eventuele kinderen, bezit worden van Henri Zachary. Slavernij op eigen bodem was in de Republiek der Verenigde Nederlanden omstrede en een in 1776 uitgevaardigd plakkaat stelde er strikte voorwaarden aan: een slaaf of slavin uit de Cariben die langer dan een half jaar in Nederland verbleef werd in principe vrij. Johanna verhuisde later naar Amsterdam, waar zij in 1774 overleed. Zoals in het testament was vastgelegd werd Isaäcq vrijverklaard. Het is onbekend wat er met de anderen in het Leidse huishouden is gebeurd.«

42 Vgl. Bastiaan van der Velden, *Ik lach met Grotius, en alle die prullen van boeken. Een rechts- geschiedenis van Curaçao*, Amsterdam: Carib Publishing, 2011, S. 181. Vrij, Susanna, S. 18-31. Vgl. auch Buvé, *Surinaamse slaven*, S. 12. Antoine J. M. Kunst, *Recht, commercie en kolonialisme in West-Indië vanaf de zestiende tot de negentiende eeuw*, Zutphen: Walburg Pers, 1981, S. 122.

heftig für die eingenommene Perspektive, die verwendete Sprache und den unkritischen Umgang mit Begrifflichkeiten des historischen Materials kritisiert.

Renske de Jong beispielsweise hat sich mit dem Phänomen der Vernachlässigung des Themas der Versklavung von »Afrikaanen«<sup>43</sup> durch Niederländer\*innen und der Aufrechterhaltung der Sklaverei in der niederländischen Republik konkret auseinandergesetzt. Er ist überzeugt, dass das Thema ein »historisches Tabu« darstelle, und bezieht sich hierbei auf eine Rede des Historikers Alex van Stipriaans, die dieser vor dem *Koninklijk Instituut voor de Tropen* 2000 gehalten hat:

»Er [Stipriaan] ist der Meinung, dass die Sklaverei in die Vergangenheit verdrängt wird, um die Kontrolle über den Lauf der Dinge in der Zukunft zu behalten. Diesem Gedankengang folgend, scheint es mir nicht falsch zu unterstellen, dass die Nation sich schämt für ihre Sklaverei-Vergangenheit. Es stört das Bild von den Niederlanden als tolerante Nation. In dieser Scham liegt, meiner Meinung nach, auch die Wurzel für den heutigen Rassismus.«<sup>44</sup>

Enrique Salvador Riveras Kritik folgt nicht der sozialpsychologischen Perspektive de Jongs und Stipriaans. Er kritisiert stattdessen – und ich bin zu demselben Schluss gekommen –, dass in der Forschungsliteratur oft auf verharmlosende Weise über Versklavung gesprochen wird, was dazu führt, dass das asymmetrische Herrschaftsverhältnis und der ausgeübte Zwang ausgeblendet werden. Immer wieder ist die Tendenz zur Verharmlosung bzw. zur Relativierung des Kolonialismus, der Versklavung der Menschen und des Handels mit versklavten Menschen zu finden, etwa in der dritten Auflage von Piet Emmers *De Nederlandse slavenhandel* von 2003:

»Manchmal ist es schon einfach, ein kleines Land zu sein. Was du auch machst, es kann nie so schlimm und so entsetzlich gewesen sein wie das, was große Länder getan haben. Gilt das auch für den niederländischen Sklavenhandel? Der Anteil der Niederlande am Handel betrug durchschnittlich nicht mehr als 5 Prozent. Das bedeutet, dass 95 Prozent aller Sklaven nicht von niederländischen Schiffen von Afrika nach Amerika gebracht wurden. [...] Obwohl unser Land herabsank von der

---

43 Renske de Jong verwendet den maskulinen Sammelbegriff »Afrikaanen« (dt. Afrikaner), um allgemein über Schwarze Menschen und People of Color zu sprechen. Vgl. z.B. Renske de Jong, Annet Zondervan, *De kleine Geschiedenis van de Slavernij: sporen in Amsterdam*, Amsterdam: KIT Publishers, 2002, S. 14.

44 Jong, *De kleine Geschiedenis*, S. 13-15, insb.: S. 15. »Hij [Stipriaan] is van mening dat het slavernijverleden wordt weggestopt om greep te houden op het verloop der dingen in de toekomst. Die gedachtegang volgend, lijkt het mij niet onjuist te veronderstellen dat de natie zich schaamt over haar slavernijverleden. Het verstoort het beeld van Nederland als tolerante natie. In deze schaamte ligt, mijns inziens, ook een wortel voor hedendaags racisme.«

größten zu einer der kleinsten Sklavenhandelsnationen, blieb der niederländische Sklavenhandel einzigartig. Kein Land hat [durch den Sklavenhandel] so viele Verluste erlitten wie die Niederlande.«<sup>45</sup>

Der Narration, die den Versklavungshandel als ein großes Verlustgeschäft darstellt, wie Emmer dies im vorangegangenen Zitat tut, haben Matthias van Rossum und Karwan Fatah-Black 2012 eine eigene Untersuchung mit dem Titel »Wat is winst?« entgegengesetzt, in der sie zeigen, dass große Teile der niederländischen Wirtschaft vom Versklavungshandel profitierten.<sup>46</sup>

Die Themen sexueller Missbrauch von versklavten Frauen\* und Zwangsprostitution im Kontext der niederländischen Sklaverei werden von Rosemary Brana-Shute und Mary Caroline Cravens besprochen. Den Autorinnen\* geht es dabei darum, die wiederum verharmlosenden Narrationen in Quellen und Literatur zu diesem Thema aufzubrechen. So kritisieren sie Erzählungen, die aus sexuellem Missbrauch romantische Liebesbeziehungen machen oder das Gebären von Kindern durch versklavte Frauen\* als strategisches Handeln konstruieren.<sup>47</sup> So ist etwa bei Cravens über die *Slave Lodge* in Kapstadt, die zentrale Unterkunft aller versklavten Personen in Kapstadt im Eigentum der VOC, Folgendes zu lesen:

»For an hour each evening the ›Calvenist‹ local officials of the VOC threw open the lodge doors to soldiers of the garrison, passing sailors, and any of the local male population. [...] In effect the lodge became a brothel, and the company slave women, prostitutes. As slave status passed through the maternal line, all of the children produced by these unions were enslaved from birth, regardless of paternity.«<sup>48</sup>

---

45 Pieter C. Emmer, *De Nederlandse slavenhandel, 1500-1850*, 2. Aufl., Amsterdam, Antwerpen: De Arbeiderspers, 2003. S. 229-230. »Soms is het wel gemakkelijker om maar een klein land te zijn. Wat je ook doet, het kan nooit zo erg en zo veel en zo verschrikkelijk zijn geweest als wat grote landen hebben gedaan. Geldt dat ook voor de Nederlandse slavenhandel? Het aandeel van Nederland in de handel bedroeg gemiddeld immers niet meer dan 5 procent. Dat wil dus zeggen dat 95 procent van alle slaven niet door Nederlandse schepen van Afrika naar Amerika zijn gebracht. [...] Hoewel ons land afzakte van de grootste tot een van de kleinste slavenhandelsnaties, bleef de Nederlandse slavenhandel uniek. Geen land heeft er zoveel verliezen op geleden als Nederland.«

46 Vgl. Matthias van Rossum, Karwan Fatah-Black, *Wat is winst? De economische impact van de Nederlandse trans-Atlantische slavenhandel*, in: *Tijdschrift voor Sociale en Economische Geschiedenis*, 9 (2012) 1, S. 3-29.

47 Leider unterlassen es die Autorinnen\*, Beispiele für die von ihnen allgemein kritisierte Literatur zu nennen.

48 Mary Caroline Cravens, *Manumission and the Life Cycle of a Contained Population: The VOC Lodge Slaves at the Cape of Good Hope, 1680-1730*, in: Rosemary Brana-Shute, Randy J. Sparks (Hg.), *Paths to Freedom. Manumission in the Atlantic World*, Columbia: South Carolina Press, 2009, S. 97-120, hier: S. 104-105.

Cravens führt weiterhin aus, dass es nur wenigen versklavten Frauen\* gelang, über diese erzwungene Prostitution tatsächlich eine stabile Beziehung mit einem Kolonisten\* einzugehen, die zu ihrem Freikauf und später zu einer Heirat führte. Einen anderen Weg, die Slave Lodge als freie Person zu verlassen, gab es für Frauen\* kaum.<sup>49</sup>

Rosemary Brana-Shute analysiert in einem Artikel von 2009 Manumissionen in Suriname im Zeitraum 1760-1826 und widerlegt darin die oft geäußerte Behauptung, dass es vor allem *weiße* Männer gewesen seien, die versklavte Menschen freigelassen hätten:

»White males were an increasing minority as manumitters. [...] The belief that manumissions were essentially the humane acts of white men freeing their mistresses and/or their colored offspring distorts the reality.«<sup>50</sup>

Auch Sandew Hira<sup>51</sup>, Kwame Nimako, Amy Abdou, Glenn Willemsen<sup>52</sup>, Stephen Small<sup>53</sup> und Melissa Wiener<sup>54</sup> sind diese und ähnliche Problematiken in der niederländischen Forschung zu Sklaverei und Kolonialismus aufgefallen. Rivera beispielsweise greift die Kritik von Nimako und Willemsen an der niederländischen Forschung zum *Dutch Atlantic* auf und wirft unter anderem Oostindie, Jessica Roitman, Wim Klooster und Filipa Ribeiro da Sliva in verschiedenen Schriften und anhand von Beispielen *Whitewashing* durch verharmlosende und verschleiernde Sprache vor.<sup>55</sup>

Die Debatte um die »blinden Flecke« bezüglich Kolonialismus und Sklaverei in der niederländischen Geschichte wird sehr kontrovers und teils polemisch geführt. Die Auseinandersetzung ist zu einem regelrechten Deutungs- und Defini-

---

49 Vgl. ebd.

50 Rosemary Brana-Shute, Sex and Gender in Surinamese Manumissions, in: Dies., Randy J. Sparks (Hg.), *Paths to Freedom. Manumission in the Atlantic World*, Columbia: South Carolina Press, 2009, S. 175-196, hier: S. 185.

51 Vgl. Sandew Hira, Decolonizing the Mind: The Case of the Netherlands, in: *Human Architecture: Journal of the Sociology of Self-Knowledge*, 10 (2012) 1, S. 53-68. Dieser Artikel ist polemisch formuliert, dennoch macht er auf wichtige Probleme in der Forschung generell und in den analysierten Schriften von R. A. J. van Lier, P. C. Emmer und Gert Oostindie im Besonderen aufmerksam.

52 Vgl. Kwame Nimako, Amy Abodou, Glenn Willemsen, Chattel Slavery and Racism: A Reflection on the Dutch Experience, in: *Thamyris/Intersecting*, 27 (2014), S. 33-52.

53 Vgl. Stephen Small, Slavery, Colonialism and their Legacy in the Eurocentric University. The Case of Britain and the Netherlands, in: *Human Architecture*, 10 (2012) 1, S. 69-80.

54 Vgl. Melissa Wiener, The Ideologically Colonized Metropole: Dutch Racism and Racist Denial, in: *Sociology Compass* 8 (2012) 6, S. 731-744, doi: 10.1111/soc4.12163.

55 Enrique Salvador Rivera, Whitewashing the Dutch Atlantic, in: *Social and Economic Studies: Special issue on Children – Reflections on adherence to Child Rights in the Caribbean*, 64 (2015) 1, S. 177-132.

tionskampf geworden, der mit harten Bandagen geführt wird. Ich möchte mich daran nicht beteiligen, sondern lediglich auf die Probleme und den Konflikt aufmerksam machen. Dirk Hoerder betont zu Recht, dass neben dem Forschungsgegenstand auch die Forschenden, deren Position, Perspektive und Reaktion auf die jeweilige Debatte um den Forschungsstand mitbedacht werden sollten, um eine belastbare Analyse vorlegen zu können. Da ohne eine Kontextualisierung der Wissenschaftler\*innen, deren Aussagen missverstanden oder in einen falschen oder verzerrten Kontext eingeordnet werden könnten.<sup>56</sup>

Die Kritik an der überwiegend älteren Forschung und den populärwissenschaftlichen Publikationen ist in den letzten Jahren auf breitere Resonanz gestoßen und in der jüngeren Forschung wird die tatsächliche Geltung des *free-soil principle* zunehmend in Frage gestellt. Die entsprechenden Untersuchungen jüngerer Datums waren für die vorliegende Studie von besonderer Bedeutung.

Die vorgebrachte Kritik an der älteren Forschung aufgegriffen, beherzigt und progressive neue Impulse gesetzt haben unter anderem Dienne Hondius und Allison Blackely. Sie stellen die Frage, wie das *free-soil principle* zu bewerten ist, und kommen zu dem Schluss, dass die Annahme, dass dieses Prinzip tatsächlich auch versklavten Menschen die Freiheit bescherte, nicht länger haltbar sei. Beide haben umfangreiche Literatur- und kleinere ergänzende Archivrecherchen zu einzelnen versklavten Akteur\*innen in der Republik vorgelegt, wodurch ihre Untersuchungen einen sehr guten Einstieg in und eine Übersicht über den Themenkomplex Schwarze Menschen und People of Color sowie Sklaverei in der niederländischen Republik bieten.<sup>57</sup>

Esther Schreuder hat mit ihrer Untersuchung *Cupido en Sideron* die erste komplexe sozialhistorische und alltagsgeschichtliche Studie zu einzelnen Akteuren\* aus kolonialen und Sklaverei-Kontexten am Hof des Statthalters Willem V. von Oranje

---

56 In seinem Vortrag während des Forschungsgesprächs des FSP Globalgeschichte wies Hoerder darauf hin, dass es gerade beim Themenkomplex Sklaverei und Unfreiheit wichtig sei zu wissen, wer in welcher Weise über das Thema schreibt und spricht und wie die Forschungsdebatte geführt wird. Meine Erfahrungen im Hinblick auf die Niederlande bestätigen das. Vgl. Julia Holzmann, Tagungsbericht: Forschungsgespräch des FSP Globalgeschichte. Slavery and Slaving Practices in Global Perspective, 04.04.2019 Wien, in: H-Soz-Kult, 23.08.2019, [www.hsozkult.de/conferencereport/id/tagungsberichte-8404](http://www.hsozkult.de/conferencereport/id/tagungsberichte-8404) (04.09.2019).

57 Vgl. Dienne Hondius, *Blackness in Western Europe. Racial Patterns of Paternalism and Exclusion*, New Brunswick u.a.: Transaction Publishers, 2014. Dies., *Access to the Netherlands of Enslaved and Free Black Africans: Exploring Legal and Social Historical Practices in the Sixteenth–Nineteenth Centuries*, in: *Slavery & Abolition*, 32 (2011) 3, S. 377–395, doi: 10.1080/0144039X.2011.588476. Dies., »No Longer Strangers and Foreigners, but Fellow Citizens«: The Voice and Dream of Jacobus Eliza Capitein, African Theologist in the Netherlands (1717–1747), in: *Immigrants & Minorities*, 28 (2010) 2–3, S. 131–153, doi: 10.1080/02619288.2010.484243. Allison Blackely, *Blacks in the Dutch World*, Bloomington, Indianapolis: Indiana University Press, 1993, S. 226–227.

vorgelegt.<sup>58</sup> Sie hat auf der Basis einer akribischen und ausführlichen Archivrecherche höfische Dokumente ausgewertet und die Lebenswege sowie die Lebenswelt von Willem Frederik Cupido (1758?–1806) aus Westafrika (heute Guinea) und Guan Anthony Sideron (1756–1803) aus Curaçao erforscht. Die Lebenswelt der beiden höfischen Dienstboten war geprägt durch die Ereignisse im Leben des Statthalters, dessen Flucht nach und Exil in England und später Deutschland, ausgelöst durch die französische Herrschaft in der Republik. Der uneindeutige Status, der erzeugt wurde durch die zeitgenössische Annahme des *free-soil principle*, und die diesem Prinzip widersprechenden Praktiken der Versklavung in den Niederlanden werden von Schreuder thematisiert, aber nicht näher analysiert.<sup>59</sup>

Matthias van Rossum und Karwan Fatah-Black geben in ihrem 2015 erschienenen Aufsatz *Slavery in a »Slave Free Enclave«?* einen guten Einblick in das Themenfeld und führen ihre jeweiligen Forschungsergebnisse zusammen. Sie weisen darauf hin, dass versklavte Menschen aus den Kolonien in die Republik kamen, benennen die Versuche der Regulierung der Ausreise aus den Kolonien und der Einreise in die Metropole und betonen, dass die persönlichen Freiheitsrechte der versklavten Menschen aus der Kolonie zugunsten der Eigentumsrechte ihrer niederländischen Eigner\*innen eingeschränkt bzw. aufgehoben wurden. Zudem verweisen sie auf die enorme Bedeutung des Sklavenhandels für die Wirtschaft der niederländischen Republik.<sup>60</sup> Etwas ausführlicher beleuchtet Fatah-Black die Frage, welche Konsequenzen eine Reise in die Republik und zurück in die Kolonie für eine versklavte Person hatte, in dem ebenfalls 2015 erschienenen Aufsatz *Terugkomen is niet hetzelfde als blijven*<sup>61</sup> und auch in der 2018 erschienenen Monografie *Eigendomsstrijd*.<sup>62</sup> Eine räumlich auf Amsterdam und zeitlich auf die Jahre 1640–ca. 1680 begrenzte Netzwerkstudie über eine kleine Gemeinschaft freier Schwarzer Menschen und People of Color wurde von Mark Ponte erarbeitet.<sup>63</sup>

---

58 Vgl. Esther Schreuder, Cupido en Sideron: Twee Moren aan het hof van Oranje, Amsterdam: Uitgeverij Balans, 2017.

59 Vgl. ebd., S. 26–27.

60 Vgl. Karwan Fatah-Black, Matthias van Rossum, Slavery in a »Slave Free Enclave«? Historical Links Between the Dutch Republic, Empire and Slavery, 1580s–1860s, in: Europas Sklaven. WerkstattGeschichte, 66/67 (2015), S. 55–74.

61 Vgl. Karwan Fatah-Black, Terugkomen is niet hetzelfde als blijven. De handhaving van de ondergeschikte status van Surinaamse slaven na een reis naar Nederland, in: Ders., Anita van Dissel, Maurits Ebben (Hg.), Reizen door het maritieme verleden van Nederland, Zutphen: Walburg Pers, 2015, S. 177–187.

62 Vgl. Karwan Fatah-Black, Eigendomsstrijd. De geschiedenis van slavernij en emancipatie in Suriname, Amsterdam: Ambo/Anthos, 2018, S. 121–128.

63 Vgl. Mark Ponte, »Al de swarten die hier ter stede comen«. Een Afro-Atlantische gemeenschap in zeventiende-eeuws Amsterdam, in: TSEG, 15 (2018) 4, S. 33–62, doi: 10.18352/tseg.995.

Dem Prinzip der Dekolonisierung in Sprache und Darstellung verpflichtet, verfolgen Kwame Nimako und Glenn Willemsen einen weiter gefassten und zum Teil vergleichenden Ansatz in ihrer Studie *The Dutch Atlantic* von 2011.<sup>64</sup> Die Autoren\* betrachten Sklaverei, Abolition und Emanzipation in globalhistorischem Kontext, also sowohl in Bezug auf die Kolonien als auch die republikanische Metropole, zeigen aber auch auf, dass diese Phänomene auch für die heutige niederländische Gesellschaft noch fundamentale Bedeutung haben. Wirtschaftliche Aspekte werden ebenso behandelt wie das *nation-building* und die Konstruktion nationaler Identität. Das *free-soil principle* wird ganz klar als Ideologie bewertet und ins Verhältnis gesetzt zur Bedeutung und Funktion des Bürgerrechts. Das Buch zeigt die Ambivalenzen und Uneindeutigkeiten im Hinblick auf Sklaverei und Unfreiheit in der niederländischen Republik auf. Ausführlich werden darin auch die Debatte um die Verfassung von 1798 und die Frage, ob Sklaverei darin ein Thema sein sollte, sowie der Weg hin zur Abolition der Sklaverei am 1. Juli 1863 in Suriname und Curaçao besprochen.<sup>65</sup>

Nimako und Willemsen haben auch zu Recht problematisiert, dass die verschiedenen Themenkomplexe, die zusammengedacht werden müssen, um die Dynamiken und die Bedeutung der Versklavung in den jeweiligen Territorien und Gesellschaften verstehen zu können, in der Forschung meist getrennt behandelt werden. So gibt es Untersuchungen zu den verschiedenen niederländischen Kolonien, die zusätzlich separiert sind in die Regionen West- und Ostindien oder Analysen des Sklavenrechts und des römischen Rechts sowie des römisch-niederländischen Rechts etc. Durch diese Separierung bleiben die Verschränkungen der Rechtssysteme, die Menschen, die zwischen den Territorien freiwillig oder unter Zwang gereist sind, und deren Erfahrungen sowie die komplexen Zusammenhänge zwischen all dem unterbelichtet.<sup>66</sup> Auffällig ist zudem, dass das Thema Rassismus im Kontext der niederländischen Sklaverei nur selten kritisch miteinbezogen

---

64 Vgl. Kwame Nimako, Glenn Willemsen, *The Dutch Atlantic. Slavery, Abolition and Emancipation*, London: Pluto Press, 2011.

65 Auch bei Arend H. Huussen kann die Debatte, ob Sklaverei in der neuen Verfassung ein Thema sein sollte, nachgelesen werden, vgl. Arend H. Huussen, *The Dutch Constitution of 1798 and the Problem of Slavery*, in: *Tijdschrift voor Rechtsgeschiedenis*, 67 (1999) 1-2, S. 99-114.

66 Generell gab es häufig erhebliche Probleme, Zugang zu Literatur zu erhalten. Die Grenzen der Nationalstaaten sind wenig durchlässig in Bezug auf die Verbundkataloge der Bibliotheken. Fernleihen von einem Land in ein anderes sind nicht vorgesehen. Je spezieller die Literatur zu einem bestimmten Bereich oder einer historischen Fragestellung in den Niederlanden ist, desto unwahrscheinlicher ist es, hierfür in Deutschland Literatur zu finden. Während der Forschungsaufenthalte in den Niederlanden habe ich daher nicht nur nach historischem Material gesucht, sondern zeitgleich auch die Forschungsliteratur in den Archiven und den umliegenden wissenschaftlichen Bibliotheken gesichtet und gescannt, um zurück in Deutschland Zugang zu der benötigten Literatur zu haben.



wird. Wenn doch, dann von den bereits genannten postkolonialen Kritiker\*innen der nationalen Geschichtsschreibung, die Bezug nehmen auf die Rassismen in der gegenwärtigen Gesellschaft, einschließlich der Wissenschaft.<sup>67</sup>

In den letzten Jahren ist ein Wandel in der Ausrichtung der Forschungslandschaft sichtbar geworden. Das *free-soil principle* wird – wie bereits gesagt – immer häufiger infrage gestellt, der Umgang mit rassistischer Sprache in den historischen Dokumenten ist reflektierter geworden, es wird stärker auf die verschiedenen Aspekte der Verflechtung der Themengebiete geachtet und mit der *Manumission*, der rechtlich vollzogenen Freilassung einer versklavten Person, ist sogar ein Forschungsgegenstand etabliert worden.<sup>68</sup>

Ein blinder Fleck, der bisher nur durch die Kritik einiger postkolonialer Kritiker\*innen (siehe oben) problematisiert wurde, ist Rassismus. Diese Kritik hat dazu beigetragen, dass die heutige Art der Darstellung von Rassifizierungen in der Analyse des historischen Materials, der Perspektive auf die Geschichte versklavter Schwarzer Menschen und People of Color und der dabei verwendeten Sprache überdacht wurden. Für eine historische Kontextualisierung der Sklaverei ist der Zugang der genannten postkolonialen Kritiker\*innen jedoch nicht nutzbar. Dies liegt daran, dass deutliche Unterschiede bestehen zwischen den von diesen kritisierten gegenwärtigen Rassismen und den historischen Strukturen, der Sprache und der Funktion frühneuzeitlicher Rassifizierungen und rassistischer Stereotypisierungen im niederländischen kolonialen Kontext. Daher wurde für diese Untersuchung Literatur aus dem Bereich der historischen Analyse des europäischen Rassedenkens in der Vormoderne herangezogen. Allerdings gilt es auch in diesem stark eingegrenzten Themengebiet des vormodernen Rassismus nochmals zu differenzieren. Ein großer Teil der Forschung setzt die Entstehung des Rassismus erst im späten 18. Jahrhundert an, wobei insbesondere ausformulierte Theorien

---

67 Vgl. Riva, *Whitewashing*. Small, *Slavery*. Hira, *Decolonize*. Weiner, *The Ideologically Colonized Metropole*. Nikamo, Willemsen, *Chattel Slavery and Racism*.

68 Vgl. Fatah-Black, Rossum, *Slavery*, S. 55-74. Fatah-Black, *Terugkomen*, S. 177-187. Nimako, Willemsen, *The Dutch Atlantic*. Hondius, *Access*, S. 379. Reggie Baay, *Daar werd wat gruwelijks verricht. Slavernij in Nederlands-Indië*, Amsterdam: Athenaeum – Polak & Van Gennep, 2015, S. 13-50, 128-154, 171. Cravens, *Manumission*, S. 97-120. Willem Wubbo Klooster, *Manumission in an Entrepôt: The Case of Curaçao*, in: Rosemary Brana-Shute, Randy Sparks (Hg.), *Paths to Freedom: Manumission in the Atlantic World*, Columbia, South Carolina: University of South Carolina Press, 2009, S. 161-174. Brana-Shute, *Sex and Gender*, S. 175-196. Matthias van Rossum, *Running Together or Running Apart? Diversity, Desertion, and Resistance in the Dutch East India Company Empire, 1650-1800*, in: Ders., Marcus Rediker, Titas Chakraborty (Hg.), *A Global History of Runaways. Workers, Mobility, and Capitalism 1600-1850*, Oakland, California: University of California Press, 2019, S. 135-155. Ders., *Kleurrijke tragiek. De geschiedenis van slavernij in Azië onder de VOC*, Hilversum: Verloren, 2015.

einzelner Gelehrter als Quellen dienen. So schreibt George L. Mosse in seiner Untersuchung zum europäischen Rassismus von 1978:

»Europäischer Rassismus wurzelte in jenen intellektuellen Strömungen, die im 18. Jhdt. sowohl in West- als auch in Mitteleuropa ihre Spuren hinterließen: in den neuen Wissenschaften der Aufklärung und in der pietistischen Wiedererweckung des Christentums. Rassismus war nicht etwa das Ergebnis einer besonderen nationalen oder christlichen Entwicklung, sondern eine Weltanschauung, eine Synthese aus Altem und Neuem – eine weltliche Religion, die es unternahm, alles zu vereinnahmen, nach dem die Menschheit strebte. Darum muß man davon ausgehen, daß die Geschichte des europäischen Rassismus ihren Ursprung im 18. Jhdt. hat – ganz gleich, welche Vorläufer man auch in früheren Epochen nachweisen kann. Im 18. Jhdt. wurde die Grundlage rassistischen Denkens gefestigt und für die kommenden eindreiviertel Jahrhunderte festgelegt.«<sup>69</sup>

Mosses Verortung des Ursprungs des europäischen Rassismus in der zweiten Hälfte des 18. Jahrhunderts etablierte sich in der Forschung und ist bis heute weit verbreitet. Auch die konstruierte teleologische Traditionslinie des Rassedenkens von der Aufklärung bis zum 20. Jahrhundert, wie sie bei ihm zu finden ist, stellt ein gängiges Interpretationsschema dar.<sup>70</sup> Allgemeinere Untersuchungen zu »Rasse«-Konstruktionen im 18. Jahrhundert beschäftigen sich mit der Sammelleidenenschaft der Europäer\*innen, den Ordnungssystemen Georg-Louis Leclercs de Buffon (1717-1788) und Carl von Linnés (1707-1778) und befassen sich mit den Schriften von Immanuel Kant (1724-1804), Georg Forster (1754-1794) und anderen Gelehrten der Zeit.<sup>71</sup>

Andreas Pečar und Damien Tricoire erörtern unter anderem die Frage, inwiefern »koloniale Rasetheorien« durch die gesellschaftlichen Hierarchien konstru-

69 George L. Mosse, *Rassismus. Ein Krankheitssymptom in der europäischen Geschichte des 19. und 20. Jahrhunderts*, Königstein/Ts.: Athenäum, 1978, S. 4-5.

70 Pečar und Tricoire geben eine gut lesbare, kritische und kurze Übersicht zu den verschiedenen Autor\*innen und deren zentralen Aussagen. Vgl. Andreas Pečar, Damien Tricoire, *Falsche Freunde. War die Aufklärung wirklich die Geburtsstunde der Moderne?*, Frankfurt a.M., New York: Campus, 2015, hier: S. 83-104.

71 Vgl. u.a. Thomas Nutz, »Varietäten des Menschengeschlechts«. Die Wissenschaft vom Menschen in der Zeit der Aufklärung, Köln u.a.: Böhlau, 2009. Gunter Mann, Franz Dumont (Hg.), *Die Natur des Menschen. Probleme der Physischen Anthropologie und Rassenkunde (1750-1850)* (Soemmerring-Forschungen, Beiträge zur Naturwissenschaft und Medizin der Neuzeit, Bd. 6), Stuttgart, New York: Gustav Fischer, 1990. Für einen schnellen Überblick über das Forschungsfeld und dessen Entwicklung vgl. Staffan Müller-Wille, »Rasse«, in: Friedrich Jaeger (Hg.), *Enzyklopädie der Neuzeit*, Bd. 10, Heidelberg: J.B. Metzler, 2009, S. 605-607. Snait B. Gissis, »Race« in the Eighteenth Century, in: *Historical Studies in the Natural Sciences*, 41 (2001) 1, S. 41-103, [www.jstor.org/stable/10.1525/hsns.2011.41.1.41](http://www.jstor.org/stable/10.1525/hsns.2011.41.1.41). Hering Torres, *Rassismus*, S. 607-619.

iert und etabliert wurden. Hierbei stellte Hautfarbe ein relevantes Kriterium dar,<sup>72</sup> wie es auch verschiedene Narrationen und Rassetheorien bemühten. Gut nachvollziehbar kommen die Historiker\* zu dem Ergebnis, dass es angesichts der starken Interpretationen bei dem Thema Rassismus in der Forschung notwendig sei, zwischen den Aspekten Aufklärung, Säkularisierung, Rassetheorien, Rassismus und Moderne zu differenzieren und diese nicht zu assoziieren. Zum einen, weil die Rassetheorien des europäischen 18. Jahrhunderts noch stark von christlichen Grundideen geprägt waren und deshalb z.B. nicht pauschal von einer Säkularisierung ausgegangen werden kann.<sup>73</sup> Zum anderen, weil die Rassetheoretiker\*innen unter den Gelehrten vor allem der Frage nachgingen, »inwiefern Universalgeschichte religiös zu erzählen sei und welche Theorie der Ehre des Schöpfers am besten gerecht werde«.<sup>74</sup> Über rassistisch motivierte Vorurteile und kolonialpolitische Bedeutungszusammenhänge ihrer Theorien stritten die Gelehrten eher selten.<sup>75</sup>

Der Appell zur Differenzierung bei der Analyse von Rassifizierungen ist notwendig und sinnvoll. Dies zeigen auch die Formen der Rassifizierungen und Stereotypisierungen im untersuchten historischen Material, die in dieser Studie abgebildet sind. Da keine der Rassetheorien der frühneuzeitlichen Autor\*innen in Gänze den Formen der Rassifizierungen und der Stereotypisierungen der hier untersuchten Quellen entspricht, habe ich lange damit gerungen, wie in der Analyse mit ihnen umgegangen werden soll. Zumal diese Zuschreibungen hier nur im Rahmen der Analyse der Praktiken der Versklavung analysiert werden können und daher keine eigenständige und systematische Untersuchung erfolgen kann.<sup>76</sup> In

---

72 Vgl. Nancy Shoemaker, *How Indians Got to be Red*, in: *The American Historical Review*, 102 (1997) 3, S. 625–644.

73 Auf der einen Seite sind hier die Monogenisten\* zu verorten, die der biblischen Erzählung folgend den Ursprung der Menschheit aus Adam, also einem Stamm, ableiteten, was sie zu der Idee der »rassischen Degenerierung« verleitete, um die verschiedenen Hautfarben der Menschen zu erklären und den so konstruierten scheinbar homogenen Bevölkerungsgruppen dabei stereotype Verhaltensmuster zuzuschreiben. Auf der anderen Seite sind die Polygenisten\* zu nennen, die davon überzeugt waren, dass die Menschheit sich an mehreren Orten in der Welt unabhängig voneinander entwickelte. Als Erklärung wurde etwa das Klima, die göttliche Schöpfung oder die Verfluchung von Hams Nachkommen durch Abraham angegeben. Vgl. Pečar, Tricoire, *Falsche Freunde*, S. 101.

74 Ebd.

75 Ebd.

76 Für eine angemessene Analyse der Rassifizierungen und der damit einhergehenden Stereotypisierungen wäre es nötig, systematisch koloniales Schriftgut auszuwerten. Für mein Forschungsgebiet wären dies etwa in Suriname verfasste Verwaltungsakten, in denen über versklavte Menschen berichtet wird, oder Briefe von Plantagenverwalter\*innen oder Einwohner\*innen, die ihren Arbeitgeber\*innen, Geschäftspartner\*innen und Familienangehörigen in der Republik über die kolonialen Verhältnisse berichteten. Wenig hilfreich für eine solche Untersuchung wären hingegen z.B. Reiseberichte von Europäer\*innen, die mit ihrem europäischen Blick und Wissenskanon über die dortigen Verhältnisse berichteten. Solche Berich-

der Arbeitsphase habe ich erfolglos nach Studien gesucht, die sich mit den unterschiedlichen Formen der Rassifizierung im langen 18. Jahrhundert vorzugsweise in den niederländischen Kolonien Suriname und Curaçao auseinandersetzen. Auch über Rassifizierungsstrategien in Hinblick auf versklavte Schwarze Menschen und People of Color am Kap der Guten Hoffnung oder über das Gedankengut repatriierter Kolonist\*innen und in der Republik scheint es bisher keine Forschung zu geben. Die einzige mir bekannte Untersuchung über die rassistische Rechtsprechung in Suriname und Curaçao im 18. Jahrhundert hat Han Jordaan vorgelegt.<sup>77</sup>

Geraldine Heng zeigt in ihrer Monografie *The Invention of Race in the European Middle Ages*<sup>78</sup> auf, dass es bereits im Hohen Mittelalter soziale Verhältnisse gab, in denen Konstruktionen von »Rasse« zur Geltung kamen und die konsequenterweise als rassistisch bezeichnet werden können und müssen. Durch eine Erfassung der Verhältnisse mit milderer Begriffen (Ethnifizierung etc.) werde verschleiert, dass es eben spezifisch rassistische Verhältnisse auch schon vor dem späten 18. Jahrhundert gegeben habe.<sup>79</sup> Heng definiert »race« folgendermaßen:

»My understanding, thus, is that race is a structural relationship for the articulation and management of human differences, rather than a substantive content.«<sup>80</sup>

Aus meiner Sicht greift diese Definition zu kurz, da sie »race« auf das Element der Stereotypisierung reduziert. Die Aspekte der mit Rassifizierung einhergehenden Marginalisierung und die hierbei erfolgenden Zuschreibung negativer Kollektiveigenschaften werden in dieser Definition jedoch ausgeblendet. Juliane Schiel, die grundsätzlich die Wichtigkeit und Notwendigkeit von Hengs Studie hervorhebt, kritisiert zugleich, dass durch die Nutzung der Containerbegriffe »Rasse«, »Rassismus« und »Sklaverei« die raum- und zeitspezifische Semantik und die dazugehörigen Praktiken überblendet würden. Zudem werde dadurch, dass das Unvertraute vergangener Epochen im Sprachgebrauch und vor der Negativfolie der

---

te spiegeln den europäischen Werterahmen und europäische Begrifflichkeiten, aber nicht oder nur in Bruchstücken den Werterahmen und das Denksystem der jeweiligen Kolonie. Da jede Gesellschaft eigene Denksysteme und Werte entwickelt, wäre es zudem zu kurz gegriffen, etwa eine Studie über Rassifizierungsstrategien auf Jamaica auf Suriname zu übertragen, auch wenn anzunehmen ist, dass es eine ganze Reihe von Überschneidungen geben könnte.

77 Vgl. Han Jordaan, *Free Blacks and Coloreds and the Administration of Justice in Eighteenth-Century Curaçao*, in: *Nieuwe West-Indische Gids*, 84 (2010) 1-2, S. 63-86.

78 Vgl. Geraldine Heng, *The Invention of Race in the European Middle Ages*, Cambridge: University Press, 2018.

79 Heng betont jedoch auch, dass Rassismus keine spezifisch europäische Erfindung ist, sondern global in sehr vielen Gesellschaften in den vergangenen Jahrhunderten in jeweils eigenen Formen entstanden ist. Ebd., S. 4-5, 23-24.

80 Ebd., S. 27.

Moderne dargestellt werde, eine neue teleologische Form der Geschichtsschreibung geschaffen und die historische Differenz werde eingeebnet.<sup>81</sup>

Max Sebastián Hering Torres hat sich in seiner Untersuchung über die *Limpieza de Sangre* ebenfalls mit vormodernen Rassismen auseinandergesetzt. Mit Bezugnahme auf Rainer Walz unterscheidet Hering Torres drei Formen von Rassismus und schafft es auf diese Weise, der dichotomischen Trennung der Forschungsmeinungen 1. Alle Formen von Ausgrenzung seien Rassismus; 2. nur die anthropologische, pseudo-naturwissenschaftliche Form des späten 18. Jahrhunderts und der Jahrhunderte danach sei Rassismus zu entgehen.<sup>82</sup> In Anlehnung an die Überlegungen von Walz spricht Hering Torres von einem »gentile[n] Rassismus«, der

»eine ›Urform der Xenophobie‹ gegenüber ethnischen Gruppen [ist], bei welcher das Anderssein des Fremden im Vordergrund stehe. [...] In Hinblick auf die Frühe Neuzeit schlug er [Walz] ferner die Bezeichnung des genealogischen Rassismus vor. Hiermit beabsichtigte er, die Segregationsversuche während der Vormoderne zu behandeln, in denen die Vorstellung von ›Rasse‹ als Kriterium der ›Herkunft‹ fungierte, ohne diese jedoch mit ›Rasse‹ im Sinne einer naturwissenschaftlichen Kategorie gleichzusetzen. Schließlich nannte Walz den modernen Rassismus, den er nach den üblichen Eigenschaften typologisiert.«<sup>83</sup>

Die Überlegungen von Walz und Hering Torres zu *genealogischem Rassismus* sind eine gute Ausgangsbasis für die von mir, im historischen Material vorgefundenen Rassifizierungen und Stereotypisierungen. Bei *genealogischem Rassismus* dient die Herkunft und somit auch die Zugehörigkeit zu einer Familie als vordergründiges Element der Kollektivierung und Segregierung von Bevölkerungsgruppen. Hierzu kann auch die Zuschreibung bestimmter körperlicher Eigenschaften gehören. Naturwissenschaftliche Kategorisierungen, die mit den Vorstellungen der Poly- und Monogenese, der Systeme der Lebewesen, die Praktik der Schädelvermessung sowie die anthropologischen Argumentationen nach Christoph Meiners (1747–1810), Johann Friedrich Blumenbachs (1752–1849) und anderer Gelehrter des 18. Jahrhunderts einhergehen, sind die »üblichen Eigenschaften« des *modernen Ras-*

81 Vgl. Juliane Schiel, Rezension zu: Heng, Geraldine: *The Invention of Race in the European Middle Ages*, Cambridge 2018. ISBN 978-1-1080-42278-9, in: H-Soz-Kult, 22.01.2020, [www.hsozkult.de/publicationreview/id/reb-27963](http://www.hsozkult.de/publicationreview/id/reb-27963) (26.05.2020).

82 Vgl. Max Sebastián Hering Torres, *Rassismus in der Vormoderne. Die »Reinheit des Blutes« im Spanien der Frühen Neuzeit* (= Campus Forschung, Bd. 911), Frankfurt a.M., New York: Campus, 2006, S. 200.

83 Vgl. Hering Torres, *Rassismus*, S. 203. Vgl. auch die etwas umfassendere Darlegung der drei Einteilungen des vormodernen Rassismus in: Rainer Walz, *Der vormoderne Antisemitismus: Religiöser Fanatismus oder Rassenwahn?*, in: *Historische Zeitschrift*, 260 (1995) 3, S. 719–748.

*sisimus*.<sup>84</sup> Die Eigenheit von »Rasse«-Konzepten und »Rassismus« ist jedoch, dass ihre Erscheinungsform von der Gesellschaft abhängt, die sie bzw. ihn hervorbringt. Hering Torres vergleicht die Wandelbarkeit, die »historische Dynamik des ›Rasse«-Konzeptes« mit der eines Chamäleons, das sich durch schimärische Färbung seinem jeweiligen Habitat angleicht. Ähnlich habe sich das Konstrukt der »Rasse« in den verschiedenen Epochen und in den unterschiedlichen Regionen der Neuzeit den jeweils vorherrschenden Moral- und Wahrheitsvorstellungen wie auch den spezifischen sozialen Wirklichkeiten und gesellschaftlichen Interessen angepasst. Infolgedessen seien neue, »trügerische Realitäten« konstruiert worden. So dienten etwa Theologie wie auch Wissenschaft in der abendländischen Gesellschaft der Wissens- und Wahrheitsproduktion, wobei das hervorgebrachte Wissen stets an Macht gebunden war.<sup>85</sup>

»Diese Institutionen [Theologie und Wissenschaft] aber waren nicht nur Produktionsstätten von Wissen und Gültigkeit, sondern auch machtvoll Fabriken der Ungleichheit. Wegen ihrer Macht konnten ihre Postulate erfolgreich verbreitet werden. In Hinblick auf die beobachteten ›Rassen«-Diskurse kann behauptet werden, dass es sich hierbei konstant um Strategien der Marginalisierung handelte. Die Funktion der Ausgrenzung bleibt das zentrale und gemeinsame Anliegen. So gesehen kann zwar von funktionaler Kontinuität gesprochen werden, nicht aber von synchronen Kausalzusammenhängen. Kurz: ›Rassen«-Diskurse verfolgen in ihren unterschiedlichen inhaltlichen Ausprägungen (Diskontinuität), das heißt Seins-Formen, stets das gleiche Ziel: Ausgrenzung (Kontinuität).«<sup>86</sup>

Im Anschluss an diese Überlegungen sollen in dieser Untersuchung unter anderem folgende Fragen verfolgt werden: Welche Verbindungen bestanden zwischen den rechtlichen und sozialen Normen und Praktiken der Versklavung, der Rassifizierungen wie auch der Stereotypisierungen in der niederländischen Republik? Welche Funktion hatten Rassifizierungen und Stereotypisierungen, um die Versklavung von Schwarzen Menschen und People of Color aufrechtzuerhalten? Können die vorgefundenen rassifizierenden Phänomene mit dem vorgestellten Begriff des *genealogischen Rassismus* gefasst werden? Wie wurden die durch Rassifizierung konstruierten Unterschiede verhandelt und welche Funktion hatten diese für die Marginalisierung der versklavten und freigelassenen Menschen und für den damit einhergehenden *weißen* Suprematie-Anspruch der Sklav\*inneneigner\*innen? Die vorliegende Arbeit ist also auch ein Beitrag zu dieser Ausdifferenzierung und

---

84 Vgl. Hering Torres, *Rassismus*, S. 203. Ausführliche Erläuterungen zu diesen Ausprägungen und Phänomenen des modernen Rassismus können bei Nutz, Varietäten, oder auch Mann, *Die Natur des Menschen* (vgl. Anm. 71) nachgelesen werden.

85 Vgl. Hering Torres, *Rassismus*, S. 249.

86 Ebd.

versucht Erscheinungsformen und Narrationen der Rassifizierungen sichtbar zu machen. Dieses Bündel von Fragen ist den zentralen Fragen der Studie, die im nun folgenden Abschnitt dargelegt werden, untergeordnet.

## 1.2 Erkenntnisinteresse

In dieser Arbeit werden die Menschen, die als Sklav\*innen (freiwillig<sup>87</sup> oder unter Zwang) republikanischen Boden betraten, in den Blick genommen. Ein zentraler Aspekt der Studie sind die detaillierten rechtlichen Konstruktionen, die erfunden wurden, um die Versklavung und die Eigentumsrechte an diesen Personen aufrechtzuerhalten, nachdem sie niederländischen Boden betreten hatten. Es geht hierbei unter anderem darum, die Logiken hinter den Normen und in den Argumentationen für und gegen Sklaverei zu erkennen, zu beschreiben und zu analysieren. Diese Logiken sind in verschiedenen Narrationen des historischen Materials sichtbar. Sie stellten zudem den Rahmen der Handlungsmöglichkeiten in Form von Normen, von gesellschaftlich akzeptiertem Zwang, aber auch von akzeptierten Widerstandshandlungen und -strategien dar, in deren Spannungsfeld versklavte Menschen, Personen mit unklarem Status und offiziell Freigelassene sich bewegen mussten. Um eine Verbindung zwischen der rechtshistorischen Analyse des Sklavenrechts (erster Teil) und den biografisch konzipierten historisch-anthropologischen Mikrostudien (zweiter Teil) herzustellen, wurde ein Schwerpunkt auf die Analyse der Praktiken der versklavten Personen, ihres sozialen Umfeldes und der Versklavenden gelegt. Als Praktiken werden wiederkehrende Handlungen, Redeweisen oder auch soziale Normierungen bezeichnet. Praktiken dienen in dieser Studie als das Bindeglied, weil sie Schnittstellen sowohl zu Rechtsnormen als auch zu den biografischen Mikrostudien aufweisen.

Dieses Analyse- und Darstellungskonzept drängte sich auf, nachdem sowohl der Forschungsstand gesichtet als auch dessen Lücken bekannt waren. Auf der Basis des vorhandenen historischen Materials sollen zum einen die Perspektiven und Lebenswelten der versklavten Menschen sichtbar gemacht und zum anderen das Normen- und Rechtssystem, welches die Versklavung dieser Menschen in der niederländischen Republik ermöglichte, untersucht werden.

Diese Studie folgt daher den Fragen: (1) Unter welchen Bedingungen war die Aufrechterhaltung des Sklavenstatus dieser aus den Kolonien mitgeführten Menschen in den Vereinigten Sieben Provinzen der niederländischen Republik im langen 18. Jahrhundert möglich? (2) Welche rechtlichen und gesellschaftlichen Nor-

---

87 Es konnte durchaus Teil einer Handlungsstrategie eines versklavten Menschen sein, den\*die Eigner\*in in die Republik zu begleiten, um dann vor Ort oder nach der Rückkehr in die Kolonie zu versuchen, die Freiheit zu erlangen.

men und Praktiken definierten die Lebenswelten der versklavten Menschen? (3) Welche Handlungsmöglichkeiten hatten die betroffenen/versklavten Personen innerhalb dieser Zwangsverhältnisse?

### 1.3 Historisches Material

Um die Spuren von möglichst vielen versklavten Personen, von deren Aufenthalt in der niederländischen Republik im Berichtszeitraum Kenntnis bestand, nachverfolgen zu können, habe ich zunächst systematisch alle Hinweise zu genannten versklavten Personen aus der verfügbaren Forschungsliteratur gesammelt, ausgewertet und anschließend die entsprechenden Quellen in Archiven in Amsterdam, Utrecht, Den Haag, Groningen, Hoogeveen-Sappemeer, Hoorn, Breda, Middelburg und Vlissingen in Augenschein genommen, fotografiert, ausgewertet und mit den Angaben in der Literatur abgeglichen. Die umfangreichsten Recherchen wurden im *Nationaal Archief Den Haag* (in den Archiven der *Staten-Generaal*, der *Sociëteit van Suriname*, der VOC, des *Hof van Holland* und des *Hooge Rad van Holland*), im *Stadsarchief Amsterdam* (Tauf-, Trau-, Sterbebücher, notarielles Archiv, *Spinhuis/Werkhuis*), in Groningen und Hoogeveen-Sappemeer<sup>88</sup> (Kataster, die Familienarchive *Star Nauta Carsten* und *Tinga*, Bevölkerungsregister, Steuerregister, Tauf-, Trau- und Sterbebücher, das Archiv der *Staten van Stad en Land*) und in Middelburg (die Familienarchive *van Doorn* und *van Citters*, *Rekenkamer van Zeeland*, *Rechtelijke Archieven*, das Archiv der *Middelburgse Commercie Compagnie* [MCC], Tauf-, Trau-, Sterbebücher, Kirchenbücher) und Vlissingen (verschiedene Kirchenbücher, das Register der Straßen und Wege und notarielle Akten) durchgeführt. In Utrecht, Hoorn und Breda habe ich gezielt nach einzelnen Personen in Kirchenbüchern und notariellen Akten gesucht. Das erhobene Material ist ausgesprochen divers und umfasst persönliche Schriftstücke wie Briefe zwischen Familienangehörigen der Eigner\*innen von versklavten Personen, Trauerreden, Reiseberichte oder biografische Aufzeichnungen, Rechtsdokumente wie Gesetze, Gesetzesentwürfe, Dienstbotenordnungen, Manumissionen und andere notarielle Urkunden und Testamente sowie Geschäftsdokumente, wie etwa Inventarlisten. Zudem – und das ist der größte Teil des gesichteten Bestandes – gibt es Verwaltungsakten, die wiederum eine große Diversität aufweisen. Teil der tradierten Unterlagen der Gerichte sind umfangreiche Narrationen über Personen und Biografien, Anklagen, Gegenanklagen, Rechnungen, private Briefe, Zeug\*innenaussagen, juristische Abhandlungen etc. In den Schriftwechseln

---

88 Das Stadtarchiv Hoogeveen-Sappemeer fusionierte am 1. Januar 2018 mit dem Archiv Groningen zum *Historisch Archief Midden-Groningen*. Die zur Zeit meines Besuchs gültige Systematik für die Registrierung des historischen Materials wurde auch nach der Fusion beibehalten.



der Dreieckskommunikation zwischen den *Staten-Generaal*, der *Sociëteit van Suriname* und der Kolonialregierung sind ebenfalls unterschiedlichste historische Materialien enthalten, beginnend bei Kopien von Privatbriefen als Beweis für oder gegen etwas, zitierte Aussagen für oder gegen etwas, Anklagen, Beschreibungen politischer Konflikte und Querelen der Kolonialregierung, Listen von Sklav\*innenauktionen, Berichte über die Besuche von freien Schwarzen Personen aus Suriname in der Republik, Konflikte mit Einzelpersonen in der Kolonie bis hin zu Informationen über die Entsendung von angeforderten Soldaten zur Aufstandsbekämpfung im Kontext der *Maroon*-Kriege Mitte des 18. Jahrhunderts in Suriname. Besonders erwähnenswert ist, dass in diesen Verwaltungsakten über fünf Jahre hinweg der komplette Schriftwechsel zur Debatte um die Entstehung des *Plakaat 1776* enthalten ist. Dieser umfangreiche Schriftwechsel, den ich gesichtet, geordnet, transkribiert und übersetzt habe, zeigt deutlich, dass Sklaverei und die Praktiken der Sklaverei in der Republik in weitem Umfang legal waren und zweifelsfrei praktiziert wurden, was im Rahmen der Analyse noch ausführlich behandelt wird. Wichtige Quellen für diese Untersuchung sind zudem die wenigen, aber sehr gut dokumentierten Auseinandersetzungen zwischen versklavten Personen und deren Eigner\*innen sowie zwischen Personen, die sich für freihielten, und Dienstherr\*innen/Eigner\*innen, die sie für Sklav\*innen hielten.

Aufgrund dieser enorm reichhaltigen Materialbasis fokussiert diese Untersuchung auf die Analyse der vorhandenen Handschriften, da diese in den meisten genannten wissenschaftlichen Untersuchungen außen vor bleiben und gedruckten Quellen der Vorzug gegeben wird.<sup>89</sup> Besonderes Augenmerk wird hier daraufgelegt, bisher in der Forschung unbekannte oder nur am Rande erwähnte versklavte oder ehemals versklavte Personen und deren Leben eingehend zu betrachten. Daher werden bereits gut erforschte Persönlichkeiten wie etwa Jacobus Capitein und Aspekte aus deren Leben nur zur Kontextualisierung berücksichtigt.<sup>90</sup> Das bisheri-

---

89 Vgl. z.B. Fatah-Black, Terugkomen. Studien, die auf handschriftlichem Material aufbauen, sind selten. Zu nennen sind etwa Schreuder, Cupido en Sideron, und Oostindie, Kondreman, S. 6-9.

90 Weiterführende Hinweise auf Forschungsliteratur zu Capitein siehe Anm. 37. Auch Leben und Werk von Anton Wilhelm Amo (1703-1753) sind in der Forschung sehr gut untersucht. Amo wurde an der westafrikanischen »Goldküste« geboren, als Kind verschleppt und von niederländischen Sklav\*innenhändler\*innen versklavt. Über die niederländische Republik gelangte er ins Heilige Römische Reich deutscher Nation, wo er an den Fürstenhof des Herzogs von Braunschweig-Wolfenbüttel als Geschenk transferiert wurde und dort das Amt des »Hofmores« bekleiden musste. Zuerst Prestigeobjekt des Herzogs, wurde Amo zu dessen »Versuchsobjekt«. Der Herzog wollte herausfinden, inwiefern »der Afrikaner« bildungsfähig sei, weshalb Amo eine umfassende Ausbildung erfuhr und u.a. an der Universität Halle studierte. In Halle ging er später auch seiner Lehrtätigkeit nach. Vgl. z.B. Ottmar Ette, Anton Wilhelm Amo – Philosophieren ohne festen Wohnsitz: Eine Philosophie der Aufklärung zwischen Europa und Afrika, Berlin: Kadmos, 2014. Yawovi Emmanuel Edeh, Die Grundlagen der philosophi-

ge weitverbreitete Ausblenden der Handschriften in der Forschung hat zur Konsequenz, dass ein großer Teil des historischen Kontextes nicht wahrgenommen wird. Erfasst wird gewöhnlich nur das gedruckte Ergebnis, nicht aber der dazugehörige Argumentationsaustausch und die darin verhandelte Logik. Dieses Problem ist besonders deutlich bei der Entstehung des *Plakaat 1776* zu erkennen. Nahezu jede genannte wissenschaftliche Publikation zu diesem Themenkomplex geht auf das *Plakaat 1776* ein, jedoch wird in keiner einzigen Untersuchung der von 1771 bis 1776 andauernde Prozess, der bis ins kleinste Detail in den Handschriften im *Nationaal Archief Den Haag* einsehbar ist, untersucht. Eine Analyse der Gesetze, auf die das *Plakaat 1776* verweist oder Auswirkungen hatte, steht ebenfalls noch aus.

Aus diesem Grund werden das Verwaltungsschriftgut der *Sociëteit van Suriname*, der *Staten-Generaal* und der *WIC* genutzt. Rechtsverhältnisse und -praktiken in der Metropole können so im Zusammenhang mit Sklaverei analysiert werden. Da das *Plakaat 1776* das einzige Gesetz war, das in der Republik die Voraussetzungen für den Erhalt der Sklaverei definierte und nur für versklavte Personen aus Suriname und Berbice gültig war, liegt ein Schwerpunkt der Untersuchung auf diesem Gesetz, der Sklaverei, die das Gesetz ermöglichte und den Menschen, die von diesen Normierungen betroffen waren.

Um dieses Material zu unterfüttern und zu kontextualisieren, wurde auf ein breites Quellenkorpus aus Rechtskodifikationen zurückgegriffen. Die Recherche und Analyse der verschiedenen Rechtssysteme und ihres Ineinandergreifens machte es notwendig, verschiedene rechtshistorische Themenbereiche zu verbinden. Um ein Verständnis dafür zu entwickeln, aus welchem Normen- und Rechtssystem die versklavten Menschen kamen, wurden *resolutionen* (*resoluties/resolutiën*), *plakaate* und rechtshistorische Studien über Sklaverei in den niederländischen Kolonien herangezogen.<sup>91</sup> Damit die normativen Logiken und Gesetze, mit denen die ver-

---

schen Schriften von Amo. In welchem Verhältnis steht Amo zu Christian Wolff, daß man ihn als »einen führenden Wolffianer« bezeichnen kann?, Essen: Die Blaue Eule, 2003. Auch die von Schreuder untersuchten Cupido und Sideron habe ich nicht weiter in meine Studie miteinbezogen. Vgl. Schreuder, Cupido en Sideron.

91 Vgl. Alan Watson, *Slave Law in the Americas*, Athens [GA], London: The University of Georgia Press, 1989, S. 102-134. Velden, Ik lach met Grotius. Henri Romundus Jordaen, *Slavernij en vrijheid op Curaçao: De dynamiek van de achttiende-eeuwse Atlantisch handelsknooppunt*, Diss., Universität Leiden, 2012. Ders., *Free Blacks*, S. 63-86. Grotius beschreibt *resoluties* und *plakaate* sowie das Landrecht der niederländischen Republik folgendermaßen: Das »allgemeine verschriftlichte Landrecht [besteht] aus Beschlüssen der Staten, das sind die Ritterschaft, die Edlen und großen Städte und zudem aus den Befehlen der Landeshäupter, denen die Macht von den Staten gesetzlich übertragen wurde, also den Grafen, Herren, Räten und hohen Obrigkeiten«. Die Beschlüsse der »Staten« nennt er in einer Anmerkung am Rand *resolutien*, also (vorgeschlagene) Einzellösungen. Als Befehle der hohen Obrigkeit bezeichnet er in einer zweiten Anmerkung am Rand die *plakaate*. Hugo Grotius, *Inleydinge tot de Hollandsche Rechts-geleertheit beschreven by Hugo de Groot [...]*, erweiterte u. ver-

sklavten Menschen in der Republik konfrontiert waren, erkannt und eingeordnet werden konnten, war es nötig, das Gewohnheitsrecht, welches erstmals von dem Rechtsgelehrten Hugo Grotius (1583-1645) kodifiziert wurde, in der Republik zu studieren.<sup>92</sup> Die Schriften Grotius' und des Völkerrechts in der Frühen Neuzeit allgemein wurden hinzugezogen, weil die *plakaate* und Rechtsnormen, die Sklaverei definierten, auf der Basis des Völkerrechts entwickelt wurden.<sup>93</sup>

Grotius' berühmtes Werk *De iure belli ac pacis* (*Das Recht des Krieges und des Friedens*) wurde erstmals 1625 publiziert. Darin beschreibt der Jurist in allen Einzelheiten das Völkerrecht (*ius gentium*) und setzte sich auch mit Sklaverei auseinander.<sup>94</sup> *De iure belli ac pacis* wurde eine der prägendsten und wichtigsten Abhandlungen der Jurisprudenz. Es stellt neben seiner zentralen Bedeutung als Kodifizierung des Völkerrechts auch eine wichtige frühe Schrift über das Naturrecht dar. Grotius' Werke

---

besserte Aufl., Amsterdam [Amsteldam]: Dirk Boom, 1767. I., II., § 17. Die Begriffe *resoluties* und *resolutiën* stellen Pluralformen des Wortes *resolutie* dar. *Resoluties* ist heute häufiger im Sprachgebrauch anzutreffen, wohingegen *resolutiën* noch oft im 18. Jahrhundert verwendet wurde.

- 92 Vgl. Reinhard Zimmermann, Römisch-holländisches Recht – Ein Überblick, in: Robert Feenstra, Reinhard Zimmermann (Hg.), *Das römisch-holländische Recht: Fortschritte des Zivilrechts im 17. und 18. Jahrhundert*, Amsterdam: Duncker & Humblot, 1992, S. 29-32. Gustaaf van Nifterik, Hugo Grotius on ›slavery‹, in: *Grotiana*, 22 (2000/01), S. 233-244. Jan Hallebeek, »Lijf ende Goedt«. De juridische bescherming van de menselijke persoon en diens vermogen. Een schets van de westerde rechtsgeschiedenis, Amsterdam: VU University Press, 2014. Laut Hallebeek, *Lijf ende Goed*, S. 155, ist Inleiding tot de Hollandsche Rechts-geleerdheid die erste Kodifizierung des holländischen Rechts.
- 93 Vgl. John W. Cairns, Stoicism, Slavery and Law, in: *Grotiana*, 22 (2000/01), S. 197-232. Nifterik, Hugo Grotius on Slavery, in: *Grotiana*, 22 (2000/01), S. 233-244. Bernd Franke, Sklaverei und Unfreiheit im Naturrecht des 17. Jahrhunderts (= Sklaverei. Knechtschaft. Zwangsarbeit. Untersuchungen zur Sozial-, Rechts- und Kulturgeschichte, Bd. 5), Hildesheim u.a.: Georg Olms Verlag, 2009. Michael Becker, *Kriegsrecht im frühneuzeitlichen Protestantismus. Eine Untersuchung zum Beitrag lutherischer und reformierter Theologen, Juristen und anderer Gelehrter zur Kriegsrechtsliteratur im 16. und 17. Jahrhundert*, Tübingen: Mohr Siebeck, 2017, S. 226-279.
- 94 Vgl. Franke, Sklaverei und Unfreiheit, S. 70. Zur Frage, in welcher Rechtstradition Grotius zu verorten und welche Einflüsse in *De iure belli ac pacis* zu finden sind, stellt Franke fest: »Die von Grotius entwickelte Gesetzes- und Rechtskonzeption stellt sich daher im Ergebnis als ein Gerüst aus Elementen unterschiedlichster Epochen und Ideologien dar, für dessen Errichtung er sich [...] hinsichtlich Organisation und Dokumentation mehr an Gentili, hinsichtlich Inhalt und Beweisführungsmethode stärker an den Scholastikern orientiert.« Franke gibt zudem einen Überblick über die zentralen Autoren\* des Naturrechts der Frühen Neuzeit. Für diese Untersuchung wurde eine niederländische Ausgabe von *De iure belli ac pacis* von 1732 verwendet, da diese die stärkste zeitliche Nähe zu den hier analysierten Dokumenten aufweist. Hugo de Groot, *Van 't regt des oorlogs en vredes* [...], Amsterdam [Amsteldam]: Soloman Schouten, 1732, doi: 10.1163/9789004359710-HGCO-GRI-073. Vgl. auch Zimmermann, Römisch-holländisches Recht, S. 28-29.

wurden als Lehrbücher an den Universitäten verwendet, so dass *De iure belli ac pacis* mitunter als »das Europäische Gesetzbuch des Völkerrechts« der Frühen Neuzeit bezeichnet wird.<sup>95</sup> Es wirkte prägend auf die politische Gestaltung Europas nach dem Achtzigjährigen Krieg (1568-1648), in dem die Niederlande ihre Unabhängigkeit von Spanien erkämpfte, bzw. dem Dreißigjährigen Krieg, weshalb es bestens geeignet ist, um eine Vorstellung vom zeitgenössischen Wissen europäischer und speziell niederländischer Juristen über Sklaverei zu erhalten.<sup>96</sup>

Wie intensiv sich die frühneuzeitliche Rechtswissenschaft in Europa mit diesem Werk auseinandersetzte, ist unter anderem daran zu erkennen, dass die lateinische Erstauflage (1625) in zwölf Sprachen, darunter Niederländisch, Deutsch, Englisch und Französisch, übersetzt und in mehr als 120 Auflagen herausgegeben wurde.<sup>97</sup> Als besonders prägend für die Rezeption von *De iure belli ac pacis* sollte sich die Arbeit des Philologen und Juristen Johann Friedrich Gronovius, eines Freundes Grotius', erweisen.<sup>98</sup> Seine um weitere Anmerkungen ergänzte Variante von *De iure belli ac pacis* erschien erstmals 1663, es folgten zwei weitere Auflagen (1680, 1735).<sup>99</sup> Für diese Studie wurde eine Ausgabe gewählt, die mit Anmerkungen von Gronovius versehen ist und von Jan van Gaveren 1704 vom lateinischen Original ins Niederländische übersetzt wurde. Dieser Druck erfuhr 1732 eine zweite Auflage. Eine Ausgabe dieser zweiten Auflage dient in der vorliegenden Studie als Quelle.<sup>100</sup> Der Übersetzer gibt an, neben Gronovius' Anmerkungen, die mit einem Sternchen (\*) gekennzeichnet sind, noch weitere Anmerkungen von Autoren\*

95 Vgl. Zimmermann, Römisch-holländisches Recht, S. 28. Hallebeek, Lijf ende Goedt, S. 138. Für eine kurze Übersicht über die zeitgenössischen Lehr- und Handbücher zum römisch-holländischen Recht vgl. Zimmermann, Römisch-holländisches Recht, S. 45-49.

96 Vgl. Franke, Sklaverei und Unfreiheit, S. 69.

97 Vgl. Andreas H. Aure, Der säkularisierte und subjektivierte Naturrechtsbegriff bei Hugo Grotius (13. Februar 2008), in: forum historiae iuris. Erste europäische Internetzeitschrift für Rechtsgeschichte, <https://forhistiur.net/2008-02-aure> (25.06.2021). H. Hofmann, Hugo Grotius, in: Michael Stolleis (Hg.), Staatsdenker der frühen Neuzeit, Frankfurt a.M.: Beck, 1995, S. 52-77, hier: S. 60.

98 Vgl. Bierma, Johann Friedrich Gronovius, in: Nieuw Nederlandsch Biografisch Woordenboek (NNBW), Deel 1, Sp. 989-992, [http://resources.huygens.knaw.nl/retroboeken/nnbw/#source=1&page=502&accessor=accessor\\_index&size=801&view=imagePane](http://resources.huygens.knaw.nl/retroboeken/nnbw/#source=1&page=502&accessor=accessor_index&size=801&view=imagePane) (07.03.2021). Siehe auch Gerhard Baader, Gronovius, Johann Friedrich, in: Neue Deutsche Biographie 7 (1966), S. 127-128, <https://www.deutsche-biographie.de/pnd119019906.html#ndbcontent> (07.06.2021). Georgios Fatouros, Gronovius, Johann Friedrich, in: Friedrich Wilhelm Bautz, Trugott Bautz (Hg.), Biographisch-Bibliographisches Kirchenlexikon, Herzberg: Traugott Bautz, 1999, Sp. 618-620.

99 Vgl. Bierma, Johann Friedrich Gronovius, Sp. 992. Die Staatsbibliothek Berlin verwahrt in ihrer Sammlung 64 verschiedene Ausgaben der von Gronovius kommentierten Schrift Grotius', die zwischen 1663 und 1773 publiziert wurden.

100 Vgl. de Groot, Van 't regt des oorlogs en vredes.

eingefügt zu haben, die er für wichtig hielt. Diese wurden alle mit einem Kreuz-Zeichen (†) gekennzeichnet, um von den Anmerkungen Gronovius unterschieden werden zu können.<sup>101</sup> So wird sichergestellt, dass der Sprachgebrauch der Quelle möglichst mit dem im Untersuchungszeitraum üblichen Sprachgebrauch übereinstimmt und auch die Rezeption des Werkes berücksichtigt werden kann. Unbeabsichtigte Fehlinterpretationen aufgrund differierenden Wortgebrauchs im historischen Material können so eher vermieden werden.<sup>102</sup> Diese durch Gronovius' Anmerkungen ergänzte Schrift Grotius' erfuhr ebenfalls noch weitere Anmerkungen von anderen Rechtsgelehrten.<sup>103</sup> Wichtig ist angesichts dieser komplexen und unübersichtlichen Rezeptionsgeschichte, dass Grotius' Text dabei nicht wesentlich verändert wurde. Zwar kamen im Laufe der Zeit z.B. eine Gliederung des Textes durch Absätze und die Einführung von Paragraphen-Zeichen hinzu. Auch wurde das ein oder andere Wort etwas dem zeitgenössischen Sprachgebrauch angepasst, etwa durch das Weglassen eines Bindestrichs, durch das Ersetzen des »x« im Wort *sulx* (*zuls* = solches) durch die Buchstabenkombination »ks«, wie es heute noch gebräuchlich ist. Der Sinn, die Formulierungen und die Grammatik des Originaltexts wurden jedoch ebenso beibehalten wie jede einzelne von Grotius selbst stammende Anmerkung. Neben dieser niederländischen Ausgabe wurde für diese Studie eine deutschsprachige Edition von *De iure belli ac pacis* von 1950 herangezogen, um eine bereits erprobte Übersetzung nutzen zu können.<sup>104</sup>

Bei dem oben bereits erwähnten von Grotius erstmals kodifizierten Gewohnheitsrecht wurde mit einer im Berichtszeitraum erschienenen Ausgabe seiner *Inleydinge tot de Hollandsche Rechts-geleertheyt* (Einführung in die holländische Rechtsgelehr-

101 Ebd., S. 47-48.

102 Bei Unklarheiten während der Arbeit an der Studie wurden Abgleiche mit weiteren Ausgaben der Schrift vorgenommen. Zum einen (1) mit der Erstausgabe der hier verwendeten Übersetzung, die 1705 erschien, oder mit einer (2) sehr früh erschienenen niederländischen Übersetzung von 1635. Zudem wurde der Text (3) in Stichproben mit der zweiten Auflage der lateinischen Erstausgabe von 1631 verglichen, die zu Lebzeiten des Autors erschien. (1) Hugo de Groot, *Van 't regt des oorlogs en vredes* [...], Amsterdam: Francois van der Plaet, 1705; (2) Hugo de Groot, *Drie boecken van Hvgo de Groot, nopende het recht des oorloghs ende des vredes* [...], Haarlem: Adriaen Roman, 1635; (3.) Hugonis Grotii, *De iure belli ac pacis libri tres* [...], 2., verbesserte Aufl., Amsterdam: Cvilium Blaeuw, 1631.

103 Beispielsweise eine lateinische Ausgabe mit den Anmerkungen von Johannes Tesmari. Tesmari stammte aus einer Gelehrtenfamilie mit höfischen Kontakten. Er wurde Professor für Jurisprudenz in Marburg. Nach seinem Tod wurde diese Schrift in lateinischer Sprache 1696 veröffentlicht. Zu Tesmari vgl. Kretzschmar, Tesmar, Johann, in: *Allgemeine Deutsche Biographie* 37 (1894), S. 587-588, <https://www.deutsche-biographie.de/pnd100868088.html#dbcontent> (07.06.2021).

104 Hugo Grotius, *De iure belli ac pacis, libri tres* – Drei Bücher vom Recht des Krieges und des Friedens., übers. v. Walter Schätzel, Tübingen: J.C.B. Mohr, 1950. De Groot, Van 't regt des oorlogs en vredes, 1732.

heit) von 1767 gearbeitet.<sup>105</sup> Diese Schrift erschien erstmals 1631 in niederländischer Sprache. Auch hier ließen es sich angesehene niederländische Juristen nicht nehmen, Anmerkungen in immer neuen Auflagen einzuarbeiten. Grotius' ursprünglicher Text wurde wiederum nur minimal und kaum merklich für eine bessere Lesbarkeit verändert. Da sich dieses Werk mit dem niederländischen Gewohnheitsrecht befasst und jedes größere Herrschaftsterritorium in Europa ein Gewohnheitsrecht eigener Prägung pflegte, unterblieben hier die Übersetzungen. Dennoch war Grotius' Werk sowohl bei niederländischen Rechtsgelehrten als auch bei Verleger\*innen begehrt. Dies zeigt sich unter anderem bei einem Blick in die verwendete Ausgabe. Darin befindet sich eine Kopie des Druckmonopols (*Privilegie*), dass der Verleger 1715 und erneut 1728 bei den *Staten-Generaal* beantragt hatte, um seine Investition in die Neuauflage zu schützen.<sup>106</sup> Über die rege Beschäftigung der niederländischen Rechtsgelehrten mit Grotius' Kodifikation des römisch-holländischen Gewohnheitsrechts legen neben den vielzähligen Neuauflagen der immer weiter ergänzte Anmerkungsapparat Zeugnis ab. Besonders stark rezipiert wurde die von Simon van Groenewegen van der Made (1613-1652) kommentierte Auflage. Groenewegen war Anwalt am höchsten Gericht in Den Haag und beschäftigte sich unter anderem mit dem Einfluss des römischen Rechts auf das römisch-holländische Gewohnheitsrecht.<sup>107</sup> Der Vergleich mit weiteren Auflagen der *Inleydinge* zeigte, dass auch hier keine nennenswerten Änderungen im Text vorgenommen wurden.<sup>108</sup>

Bei den *plakaaten* und *resolutionen* aus den niederländischen Kolonien der West Indies wurde auf das *plakaat-boek* und die Edition von Schiltkamp und Smidt zurückgegriffen.<sup>109</sup> Um das frühneuzeitliche niederländische Sklavenrecht mit dem

---

105 Hugo Grotius, *Inleydinge tot de Hollandsche Rechts-geleertheyt* beschreven by Hugo de Groot [...], erweiterte u. verbesserte Aufl., Amsterdam [Amsteldam]: Dirk Boom, 1767.

106 Vgl. ebd., *Privilegie*, ohne Seitenangabe. *Privilegie* kann als Privileg, also als Druckmonopol, verstanden werden.

107 Vgl. R. W. Lee, *The Introduction to the Jurisprudence of Holland* (Inleiding tot de Hollandsche Rechts-Geleertheyd) of Hugo Grotius, in: *Transactions of the Grotius Society*, 16 (1930): Problems of Peace and War. Papers Read before the Society in the Year 1930, S. 29-40: hier: S. 34-35. Robert Feenstra, Groenewegen (van der Made), Simon van, in: Michael Stolleis (Hg.), *Juristen: Ein biographisches Lexikon; von der Antike bis zum 20. Jahrhundert*, 2. Aufl., München: Beck, 2001, S. 263.

108 Überprüft wurden folgende zwei Ausgaben, insbesondere die Einträge zu *De Vryheit*, *Inschuld*, *Borge*, *vreyen ende onvryen*: Hugo de Groot, *Inleydinge tot de Hollandsche Regts-geleertheit* [...], Amsterdam: Iacob Pietersz Wachter, 1647. Hugo Grotius, *Inleidinge tot de Hollandsche rechtsgeleerdheid* [...], Middelburg: Pieter Gillissen, 1767.

109 Jacob A. Schiltkamp, Jacobus Th. de Schmidt, *West indisch Plakaatboek*. Plakaten, Ordonnantien en andere Wetten. Uitgevaardigd in Suriname 1667-1816, Teil I. u. II. Amsterdam: S. Emmering, 1973. Das Archief Middelburg (ZAM) hat eine komplette Reihe des Gesetzbuchs zur Einsicht: Groot plaacet-boek, Bd. 9, 1796, 64<sup>E</sup>, 29.1.1770.

antiken römischen Recht abzugleichen, habe ich den *Corpus iuris civilis mit dem Codex Iustinianus*, herangezogen.<sup>110</sup>

Diese Schriften sind in Deutschland leicht verfügbar. Schwieriger hingegen ist es, sich Zugang zu den im Hinblick auf Sklaverei in den Territorien der VOC einschlägigen Gesetze zu verschaffen. Hier musste ich mich meist auf Angaben aus der Sekundärliteratur verlassen.<sup>111</sup>

Eine Studie, die diese verschiedenen Rechtssysteme zusammendenkt und auf Sklaverei und den Transfer des Sklavenstatus von der niederländischen Kolonie in die Metropole analysiert, gibt es bisher nicht. Diese Lücke versucht die vorliegende Untersuchung zu schließen.<sup>112</sup>

Es scheint nicht möglich zu sein, alle Menschen, die einem Sklaverei-Kontext entstammten und in die Republik kamen oder mitgeführt wurden, vollständig zu erfassen. Es gab keine zentrale Buchführung darüber, wer in der Republik versklavt wurde und wer nicht, auch wenn diese Annahme hin und wieder geäußert wird.<sup>113</sup> Der Status der Menschen, ob frei oder versklavt, wird häufig erst aus dem Kontext des historischen Materials ersichtlich und viele Menschen haben nur minimale Spuren, die oft nur Fragmente eines Lebens erkennen lassen, in den tradierten Dokumenten hinterlassen, ein Eintrag im Taufbuch vielleicht oder eine Nennung in einem Testament. Während der Arbeit an dieser Studie wurde nur ein kleiner Teil der Archive in den Niederlanden aufgesucht und dabei wiederum nur ein Teil der für die Fragestellung interessanten Bestände gesichtet. Dies genügte bereits, um das relevante historische Material auf eine so überwältigende Menge anwachsen zu lassen, dass eine Auswahl getroffen und die Untersuchung auf bestimmte Aspekte und wenige Personen beschränkt werden musste. Bisher gibt es keine annähernd genaue Schätzung, wie viele Menschen in der Republik versklavt wurden und wie

---

110 Jop E. Spruit, J. M. J. Chorus, L. de Ligt (Hg.), Nov. 78, het recht der gouden ringen. *Corpus iuris civilis*, Bd. XI, Novellen 51-114, Amsterdam: University Press, 2011, S. 164-172.

111 Vgl. Rossum, Kleurrijke tragiek. Baay, Daar werd wat gruwelijks verricht. Hollebeek, Lijf en Goed. Karel Schoeman, *Early Slavery at the Cape of Good Hope, 1652-1717*, Pretoria: Protea Book House, 2007. Zudem Anthonie van Diemen, *De Statuten van Batavia*, o.O., 1642. Die Statuten van Batavia stellten in schriftlicher Form Richtlinien für die Verwaltung und Organisation der Kolonie dar. In den Statuten wurde grundsätzlich festgelegt, dass und wie Gottesdienste stattfanden, wie Gerichte funktionierten und welches Personal welche Aufgaben übernahm, welche Eide zu schwören waren etc. Sie wurden von *Generalgouverneur* und *Raad van Indien* Anthonie van Diemen verfasst und von den *Staten-Generaal* bestätigt. 1642 wurden sie publiziert und galten dann für das gesamte Territorium der VOC. Eine Bewertung und Kontextualisierung der Statuten ist bei Karel Schoeman, *Early Slavery*, S. 17-19 zu finden. Als Digitalisat ist das Dokument online zugänglich, siehe Link in der Bibliografie.

112 Ein Anspruch auf Vollständigkeit der Studie und eine erschöpfende Analyse wird nicht erhoben.

113 Vgl. Hondius, *Access*, S. 385. Mallinckrodt, *Verhandelte (Un-)Freiheit*, S. 354. Auf diesen Aspekt wird im ersten Teil der vorliegenden Studie ausführlicher eingegangen.

viele während ihres Aufenthalts dort für frei erklärt wurden. Wer wie lange und an welchen Orten in der Republik gelebt hat, ist nur bei sehr wenigen Personen überhaupt feststellbar. Es erschien daher sinnvoll, eine Vorstellung von den Lebenswelten einiger weniger Menschen in einem begrenzten Zeitabschnitt in Form von Mikrostudien zu erarbeiten. Neben und in den Mikrostudien werden unter anderem die Gesetze und Normen, die den Aufenthalt und den Status der verschleppten und versklavten Personen bestimmten, analysiert. Diese Kombination aus rechts- und mikrohistorischen sowie historisch-anthropologischen Zugängen ist geeignet, um die Gesellschaft der Republik im 18. Jahrhundert, die Perspektiven der vorgestellten versklavten Menschen auf die Gesellschaft und die gesellschaftlichen Reaktionen auf die versklavten Personen sichtbar zu machen. Diese Perspektiven und Reaktionen waren keineswegs homogen, weshalb diese Untersuchung sie anhand der Geschichten einzelner Individuen vorstellt und damit zu rekonstruieren sucht, welche Ansichten, Vorstellungen und Handlungsmöglichkeiten denkbar waren. Ziel ist es somit, den Denkhorizont der niederländisch-republikanischen Gesellschaft im langen 18. Jahrhundert in Hinblick auf Sklaverei und freiheitliche Privilegien, auf Schwarze Menschen, auf People of Color, auf Menschen mit einer globalen Biografie und deren Wirken in dieser Gesellschaft erkennbar werden zu lassen.

## 1.4 Methode

Die überlieferten Spuren subalternen Akteur\*innen (nicht an der Herrschaft teilhabende Menschen), Handlungsmöglichkeiten und -logiken, soziale Felder bzw. Lebenswelten können unter Zuhilfenahme verschiedener methodischer Ansätze aus dem historischen Material herausgearbeitet und analysiert werden. Diese Studie verfolgt zu diesem Zweck einen mikrohistorisch-globalen, historisch-anthropologischen und an der Theorie der Praktiken orientierten Ansatz.<sup>114</sup>

114 Für einen Überblick über die Debatte um Mikro- und Makrogeschichte und einen Einstieg in die Mikrogeschichte vgl. Jürgen Schlumbohm, *Mikrogeschichte – Makrogeschichte: Zur Eröffnung einer Debatte*, in: Ders. (Hg.), *Mikrogeschichte – Makrogeschichte. Komplementär oder inkommensurabel?* (= Göttinger Gespräche zur Geschichtswissenschaft, Bd. 7), Göttingen: Wallstein, 1998, S. 9-31. Hans Medick, *Mikro-Historie*, in: Winfried Schulze (Hg.), *Sozialgeschichte, Alltagsgeschichte, Mikro-Historie. Eine Diskussion*, Göttingen: Vandenhoeck & Ruprecht, 1994, S. 40-53. Carlo Ginzburg, *Mikro-Historie. Zwei oder drei Dinge, die ich von ihr weiß*, in: *Historische Anthropologie*, 1 (1993), S. 169-192. Für einen Einblick in historisch-anthropologische Methodik siehe Caroline Arni u.a. (Hg.), *Editorial*, in: *Historische Anthropologie*, 1 (1993), S. 1-4. Hohkamp, *Geschichtswerkstätten und die Geschichte der Frühen Neuzeit. Reflexionen über eine Beziehungsgeschichte und ihre historiografischen Aspekte*, in: *WerkstattGeschichte*, 75 (2017) 1, S. 105-110. Jakob Tanner, *Historische Anthropologie*, S. 1-14, in: *Docupedia-Zeitgeschichte*, 03.01.2012, <https://doi.org/10.14765/zzf.dok.2.278.v1> (04.09.2019).



Durch die Zusammenführung von Mikro- und Globalgeschichte ist es möglich, historische Akteur\*innen (Mikroebene) und Strukturen (Makroebene) gleichermaßen in den Blick zu nehmen<sup>115</sup> und den bereits kritisierten methodologischen Nationalismus sowohl zu über- also auch zu unterschreiten. Die Unterschreitung gelingt durch die Ausrichtung der Studie auf subalterne Akteur\*innen und deren Lebenswelten. Hierbei ist auch von Interesse, in welchen Relationen sich die Akteur\*innen verorten oder verortet werden und in welcher Weise soziale Differenzen in den jeweiligen Gesellschaften formuliert werden und/oder zum Tragen kommen. Auf diese Weise können das Handeln, die Vorstellungen der Akteur\*innen und auch Prozesse kontextualisiert und der Ursprung von asymmetrischen Herrschaftsverhältnissen erkannt werden. Die Überschreitung des methodologischen Nationalismus und damit auch des Eurozentrismus wird erreicht durch die transnationale Perspektive, die Kolonien und Metropole zugleich bzw. in ihrer Verflochtenheit in die Untersuchung einbezieht. Globalisierung in der Geschichtswissenschaft, so Sebastian Conrad, »ist [...] nicht eine Metatheorie, sondern eher eine Perspektive, die dazu beitragen kann, Prozesse in einem umfassenderen Kontext zu situieren und den methodologischen Nationalismus der Geschichtswissenschaft zu unterminieren«.<sup>116</sup> Es geht daher um die Analyse und Einordnung von Prozessen innerhalb eines umfassenderen Kontextes und das Über- oder Unterschreiten

---

Hinsichtlich einer Theorie der Praktiken stütze ich mich vor allem auf Andreas Reckwitz, Grundelemente einer Theorie sozialer Praktiken. Eine sozialtheoretische Perspektive. Basic Elements of a Theory of Social Practices. A Perspective in Social Theory, in: Zeitschrift für Soziologie, 32 (2003) 4, S. 282-301, hier: S. 290. Die Theorie der Praktiken setzt Reckwitz zufolge für die Analyse der *skillful performances* (Praktiken) drei Grundannahmen voraus: »eine ›implizite‹, ›informelle‹ Logik der Praxis und Verankerung des Sozialen im praktischen Wissen und ›Können‹; eine ›Materialität‹ sozialer Praktiken in ihrer Abhängigkeit von Körpern und Artefakten; schließlich ein Spannungsfeld von Routinisiertheit und systematisch begründbarer Unberechenbarkeit von Praktiken.« Ebd., S. 282. Dagmar Freist, Diskurse – Körper – Artefakte. Historische Praxeologie in der Frühneuezeitforschung – eine Annäherung, in: Dies. (Hg.), Diskurse – Körper – Artefakte. Historische Praxeologie in der Frühneuezeitforschung, Bielefeld: transcript, 2015, S. 9-32. Marian Füssel, Praktiken historisieren. Geschichtswissenschaft und Praxistheorie im Dialog, in: Franka Schäfer, Anna Daniel, Frank Hillebrandt (Hg.), Methoden einer Soziologie der Praxis, Bielefeld: transcript, 2015, S. 267-287. Siehe auch Christian De Vito, Anne Gerritsen (Hg.), Micro-Spatial Histories of Global Labour, London: Palgrave Macmillan, 2018, und ders., History Without Scale. The Micro-Spatial Perspective, in: Past and Present, 242 (2019), Issue Supplement 14: Global History and Microhistory, S. 348-372.

115 Die hier vorgebrachten methodischen Angaben zu Mikro- und Globalgeschichte orientieren sich vorrangig an Angelika Epples Überlegungen, vgl. hierzu z.B. Angelika Epple, Globale Mikrogeschichte. Auf dem Weg zu einer Geschichte der Relationen, in: Jahrbuch für Geschichte des ländlichen Raumes, 9 (2012), S. 37-47, hier: S. 38-41.

116 Sebastian Conrad, Andreas Eckert, Globalgeschichte, Globalisierung, multiple Modernen: Zur Geschichtsschreibung der modernen Welt, in: Dies., Ulrike Freitag (Hg.), Globalgeschichte, Frankfurt a.M., New York: Campus, 2007, S. 7-49, hier: S. 20.

des methodologischen Nationalismus des 19. und 20. Jahrhunderts, der die Grenzen des Nationalstaats und die Perspektive der Nation als genuine Standard und Grenze für historische Untersuchungen gesetzt hatte.<sup>117</sup> In diesem Sinne bilden niederländisch-republikanische Territorien (Metropole und Kolonien) und deren soziale Konstruiertheit zwar den Rahmen der Darstellung, zentral sind jedoch die Lebenswelten der subalternen Akteur\*innen: ihre Beziehungsnetze und -systeme, die Praktiken einzelner versklavter Individuen, soziale Hierarchien, koloniale Rassifizierungen und rassistische Stereotypisierungen, die Normen- und Rechtssysteme und deren enge Verflechtung zwischen den Territorien, in denen die Individuen navigieren mussten. Dieser mikrohistorisch-globale Untersuchungsrahmen enthält bereits sehr viele Elemente des historisch-anthropologischen Methodenansatzes. In seinem Aufsatz *Historische Anthropologie* erläutert Jakob Tanner diesen theoretisch-methodischen Ansatz wie folgt:

»[Es] lassen sich drei interdependente Fragenkomplexe und Themenfelder auseinanderhalten, die nach wie vor von hervorzuhebender Bedeutung sind: Erstens geht es um die sich verändernden diskursiven, ikonischen Formen und medialen Bedingungen menschlicher Selbstbeschreibungen sowie den Wandel von Menschenbildern; zweitens um soziale Praktiken, kommunikative Interaktionsmuster wie auch die symbolischen Formen und Machtbeziehungen, durch die das Gesellschaftliche der Menschen strukturiert und reguliert wird. Drittens steht die Geschichtlichkeit der ›menschlichen Natur‹ zur Diskussion.«<sup>118</sup>

In dieser Studie wird eine historisch-anthropologische Perspektive eingenommen. Dies geschieht z.B. bei der Analyse von Logiken, denen die beteiligten Akteur\*innen während des Gesetzgebungsprozesses des *Plakaat* 1776 folgten, bei der Analyse von gerichtlichen Dokumenten oder Selbst- und Fremdbildern einzelner Akteur\*innen wie auch bei der Auslotung von Handlungsmöglichkeiten der historischen Akteur\*innen und der Analyse ihrer Lebenswelten, Gewohnheiten oder Praktiken der Wissensaneignung.<sup>119</sup>

Sowohl für den mikrohistorisch-globalen Rahmen als auch für die spezifisch historisch-anthropologische Perspektive der Studie ist die Analyse von historischen Praktiken zentral. Als kleinste Einheit des Sozialen sind Praktiken *skillful performances*, die an Zeit und Raum und an ein spezifisches Wissen gebunden sind. Unter einer Praktik wird eine routinisierte Handlung, eine Bewegung des Körpers, eine wiederkehrende Aktivität verstanden. Auch intellektuelle Tätigkeiten wie Lesen, Schreiben oder Sprechen fallen darunter:

117 Vgl. Epple, Globale Mikrogeschichte, S. 44.

118 Tanner, Historische Anthropologie, S. 7.

119 Ebd., S. 6-8.

»Diese Körperlichkeit des Handelns und der Praktik umfasst die beiden Aspekte der ›Inkorporiertheit‹ von Wissen und der ›Performativität‹ des Handelns: ›Nach innen‹ setzt die Fähigkeit der Akteure zum Vollzug einer Praktik als Sequenz von Körperbewegungen eine ›Inkorporierung‹ (Bourdieu) von Wissen, eine Inkorporierung von know how und eines praktischen Verstehens voraus. [...] ›Nach außen‹ bedeutet die Körperlichkeit des Vollzugs von Praktiken, dass sie von der sozialen Umwelt (und im Sinne eines Selbstverstehens auch von dem fraglichen Akteur selber) als eine ›skillful performance‹ interpretiert werden kann: die Praktik als soziale Praktik ist nicht nur eine kollektiv vorkommende Aktivität, sondern auch eine potenziell intersubjektiv als legitimes Exemplar der Praktik X verstehbare Praktik – und diese soziale Verständlichkeit richtet sich auf die körperliche ›performance‹.«<sup>120</sup>

Für die Analyse von Praktiken spielen auch *Artefakte* eine wichtige Rolle: *Artefakte* sind – so weiter Reckwitz – »Gegenstände, deren sinnhafter Gebrauch, deren praktische Verwendung Bestandteil einer sozialen Praktik oder die Praktik selbst darstellen«.<sup>121</sup> Nach dieser Definition können die in dieser Studie untersuchten *plakaate* als *Artefakte* angesehen werden. *Praktisches Wissen* wird »in sozialen Praktiken mobilisiert« und als Untersuchungsgegenstand rekonstruiert. Es umfasst das »interpretative Verstehen« »einer routinemäßigen Zuschreibung von Bedeutungen zu Gegenständen, Personen, abstrakten Entitäten, dem ›eigenen Selbst‹ etc.; [...] methodisches Wissen [...], d.h. ›script‹-förmige Prozeduren, wie man eine Reihe von Handlungen ›kompetent‹ hervorbringt«.<sup>122</sup>

Dies bedeutet, dass Sender\*in und Empfänger\*in über denselben oder annähernd gleichen Wissensbestand verfügen und dies in Form eines *Codes*, in beispielsweise nur einem Wort oder einer Handbewegung, ausdrücken können. Hinter diesem Code verbirgt sich Wissen, das *interpretativ* verstanden werden muss. Es ist dabei kein universales Wissen, sondern wird »als historisch-spezifisch, als ein letztlich kontingentes ›local knowledge‹« vorausgesetzt.<sup>123</sup> Die routinierten Wiederholungen (Praktiken) erzeugen Muster unter anderem in Narrationen und Sprache. Diese Wiederholungen können aber auch aufgrund von Neuinterpretationen im täglichen Vollzug bei »Überraschungen des Kontextes«<sup>124</sup> (*neues Setting*) oder dem Aufkommen neuer *Artefakte* (z.B. *plakaate*) unter Druck geraten, was »Zukunftsungewissheit«<sup>125</sup> erzeugt und/oder das »Potential zu Sinnverschiebungen«<sup>126</sup> birgt.

120 Reckwitz, Grundelemente, S. 290.

121 Ebd., S. 291.

122 Ebd., S. 292.

123 Ebd., S. 292-293; der Begriff des *local knowledge* wurde von Clifford Geertz geprägt.

124 Ebd., S. 294-295.

125 Ebd., S. 295.

126 Ebd.

Trotz dieser Flexibilität der sozialen Praktiken und des darin enthaltenen praktischen Wissens sind soziale Praktiken an ein bestimmtes »soziales Feld«<sup>127</sup> (z.B. die Institution Sklaverei in der niederländischen Kolonie) gebunden, was voraussetzt, dass die Praktiken aufeinander abgestimmt sind. Dies bedeutet, dass etwa koloniale Rassifizierungen und rassistische Stereotypisierungen in den vorgebrachten Narrationen an die republikanischen Verhältnisse angepasst wurden.

An das »interpretative Verstehen« aber auch an die Wandelbarkeit der Praktiken dockt die Theorie der »Selbst-Bildung« von Thomas Alkemeyer, Gunilla Budde und Dagmar Freist an, die besonders im zweiten Teil der vorliegenden Studie Anwendung findet, wenn im Rahmen der Mikrostudien unter anderem nach dem Selbst- und Fremdbild der beschriebenen Menschen gefragt wird.<sup>128</sup> Die Gebundenheit der Reproduktion der sozialen Praktiken an Zeit und Raum macht die in

---

127 Ebd.

128 Vgl. Thomas Alkemeyer, Gunilla Budde, Dagmar Freist, Einleitung, in: Dies. (Hg.), *Selbst-Bildungen: Soziale und kulturelle Praktiken der Subjektivierung*, Bielefeld: transcript, 2013, S. 9-30. Ergänzt habe ich diese Herangehensweisen um Überlegungen aus dem Bereich der Selbstzeugnisforschung, da Selbstzeugnisse einen wichtigen Bestandteil des historischen Materials bilden. Für einen Überblick über das Feld der Selbstzeugnisforschung vgl. Gabriele Jancke, Claudia Ulbrich (Hg.), *Querelles: Jahrbuch für Frauen- und Geschlechterforschung*, Nr. 10, Göttingen: Wallstein, 2005. Benigna von Krusenstjern, Was sind Selbstzeugnisse? Begriffskritische und quellenkundliche Überlegungen anhand von Beispielen aus dem 17. Jahrhundert, in: *Historische Anthropologie*, 2 (1994) 3, S. 463-471. Philippe Lejeune, Der autobiographische Pakt, in: Ders., *Der autobiographische Pakt*, Frankfurt a.M.: Suhrkamp, 1994, S. 13-50. Wolfgang Behringer definiert Selbstzeugnisse folgendermaßen: »Im Unterschied zur Autobiographie umfassen S[elbstzeugnisse] auch nicht intentional überlieferte Zeugnisse von Individuen; sie greifen also von der bewussten Tradition in den Bereich der »Überreste« (J. G. Droysen) über. Dazu können im Zuge von Verwaltungsakten und Gerichtsverfahren entstandene Dokumente (z.B. Suppliken, Verhörprotokolle, Zeugenbefragungen) ebenso gehören wie Kunst- oder Handwerksprodukte.« Wolfgang Behringer, »Selbstzeugnisse«, in: *Enzyklopädie der Neuzeit Online*, doi: [http://dx.doi.org/10.1163/2352-0248\\_edn\\_COM\\_348440](http://dx.doi.org/10.1163/2352-0248_edn_COM_348440). In Bezug auf Zeugenverhöre als Ego-Dokumente in den Akten des Reichskammergerichts schreibt Winfried Schulze: »Im Mittelpunkt stehen [...] die Aussagen der einzelnen Zeugen über ihre Person, ihre Lebensumstände und gesellschaftliche Position zum einen, und zum anderen ihre in der Aussage dokumentierte Kenntnis der strittigen Rechte, der administrativen Vorgänge, der Nutzung von Herrschaftsrechten durch die streitenden Parteien etc.« Winfried Schulze, Zur Ergiebigkeit von Zeugenbefragungen und Verhören, in: Ders. (Hg.), *Ego-Dokumente: Annäherung an den Menschen in der Geschichte (= Selbstzeugnisse der Neuzeit, Bd. 2)*, Berlin: De Gruyter, 1996, S. 319-325, hier: S. 320. Das etwas enger gefasste Konzept der Ego-Dokumente in den Niederlanden wird von Rudolf Dekker, der seit Beginn der systematischen Erforschung dieser Quellengattung dort einen wichtigen Beitrag geleistet hat, erläutert. Vgl. Rudolf Dekker, Ego-Dokumente in den Niederlanden vom 16. bis zum 17. Jahrhundert, in: Winfried Schulze (Hg.), *Ego-Dokumente. Annäherung an den Menschen in der Geschichte. Selbstzeugnisse der Neuzeit, Bd. 2*, Berlin: De Gruyter, 1996, S. 33-58.

dieser Studie angewandte Theorie der *slaving zones* von Jeff Fynn-Paul anschlussfähig an die Theorie der Praktiken.<sup>129</sup> Fynn-Pauls Überlegungen zu *slaving*- und *no-slaving zones* helfen insbesondere, die Verflechtungen von Sklaverei, Verschleppung und kolonialen Rassifizierungen zu erfassen, wie sie im Kontext des Transfers von Menschen und Normen von einem Territorium in ein anderes während des niederländischen Kolonialismus zu beobachten sind.

Bei der Analyse des Sprachgebrauchs wird auf zeitgenössische explizite, unterschwellige oder chiffriert verhandelte Sklaverei, koloniale Rassifizierungen und geschlechtsspezifische Zuschreibungen geachtet.<sup>130</sup> Das historische Material wird qualitativ ausgewertet. Bei der Analyse der biografischen Mikrostudien, in denen einzelne Menschenleben, bzw. (bruchstückhafte) Narrationen darüber, als Untersuchungseinheiten fungieren, wird der (städtische) Raum und dessen Nutzung einbezogen. Das Globale wird im Lokalen oder auch in der Geschichte einer einzelnen Person erkennbar, Aneignungsprozesse bezogen auf soziale Rollen und juristisches Wissen werden sichtbar. Anhand der biografischen Mikrostudien werden die Verflechtung und Vernetzung von Regionen, Ländern, Kontinenten, Personen und Dingen untersucht.

## 1.5 Aufbau

Der Hauptteil der Studie ist in zwei Teile gegliedert. Teil I, bestehend aus fünf thematischen Kapiteln, liefert (1.) grundlegende Informationen über die herrschaftliche Organisation der niederländischen Territorien (Metropole und Kolonien) und des Rechtssystems. Es werden die konkreten frühneuzeitlichen Vorstellungen von Sklaverei am Beispiel der Schriften von Hugo Grotius (Völkerrecht und niederländisches Gewohnheitsrecht) erläutert. Besondere Beachtung finden hierbei die Lo-

129 Vgl. Jeff Fynn-Paul, Introduction. Slaving Zones in Global History: The Evolution of a Concept, in: Ders., Damian Alan Pargas (Hg.), *Slaving Zones. Cultural Identities, Ideologies, and Institutions in the Evolution of Global Slavery* (= *Studies in Global Slavery*, Bd. 4), Leiden: Brill, 2018, S. 1-19. Ders., Introduction. Empire, Monotheism and Slavery in the Greater Mediterranean Region from Antiquity to the Early Modern Era, in: *Past and Present*, 205 (2009), S. 3-40.

130 Für einen Überblick über linguistische Sprachanalysen und deren Kopplung an mikrohistorische Studien vgl. Joseph C. Miller, Epilog. Appreciation and Response: Historical Paths Forward from Here, in: *Journal of Global Slavery*, 2 (2017), S. 337-377. Cláudio Costa Pinheiro, Blurred Boundaries. Slavery, Unfree Labour and the Subsumption of Multiple Social and Labour Identities in India, in: Marcel van der Linden, Prabhu P. Mohapatra (Hg.), *Labour Matters. Towards Global Histories. Studies in Honour of Sabyasachi Bhattacharya*, New Delhi: Tulika Books, 2009, S. 173-194. Stefan Hanß, Juliane Schiel (Hg.), *Mediterranean Slavery Revisited (500-1800). Neue Perspektiven auf Mediterrane Sklaverei (500-1800)*, Zürich: Chronos, 2014.

giken, die den Transfer des Sklavenstatus von einer niederländischen Kolonie in die Republik möglich machten. (2.) Anhand von tradierten und bereits untersuchten Rechtsfällen wird die praktische Auseinandersetzung der Gerichte mit Sklaverei, so wie sie in der Forschung bisher dargestellt worden ist, in der Republik besprochen. (3.) Daran schließt die Analyse des Entstehungsprozesses und der Bedeutung des *Plakaat 1776* an. Von besonderem Interesse sind hierbei die Logiken und Praktiken der Versklavung und der Aufrechterhaltung derselben in der Republik. Zugleich werden durch die gewählte Untersuchungsperspektive Handlungsmacht, -logiken und -möglichkeiten einzelner Akteur\*innen sichtbar. Die Analyse von Manumissionen (4.) zeigt eine weitere Facette des Komplexes Sklaverei auf. Hierbei werden strukturelle Muster und Veränderungen im Umgang mit Sklaverei und Manumission im 18. Jahrhundert erarbeitet. (5.) Um den Themenkomplex Sklaverei im niederländisch-republikanischen Kontext angemessen einzufassen, werden die rechtliche, normative und historisch-politische Entwicklung im Hinblick auf Sklaverei und die Abolition der Sklaverei 1861 bzw. 1863 dargelegt.

Ein zeitgenössisches Konzept von Sklaverei wird mittels der beschriebenen methodischen Ansätze aus den Darstellungen des ausgewählten historischen Materials rekonstruiert.<sup>131</sup> Hierbei liegt der Fokus auf den Schriften von Hugo Grotius und verschiedenen niederländischen Gesetzen und Gerichtsurteilen. Der gesamte erste Teil ist den Fragen gewidmet, was im 18. Jahrhundert im niederländischen kolonialen und republikanischen Verständnis als Sklaverei angesehen wurde, wer davon betroffen war und wie und warum es möglich war, in verschiedenen Rechtssystemen (koloniales und republikanisches) eine Form von Sklaverei zu transferieren, zu erhalten und schlussendlich zu etablieren?

Der zweite Teil der Studie besteht aus drei biografischen Mikrostudien, die einen Einblick in die historischen Lebenswelten versklavter und ehemals versklavter Menschen in der niederländischen Republik gestatten. Ausgewählt wurden die hier vorgestellten Menschen aufgrund des besonders umfangreichen und reichhaltigen tradierten historischen Materials zu ihren jeweiligen Biografien. Diese Mikrostudien vermitteln eine Vorstellung davon, welche Handlungsmöglichkeiten die versklavten oder vormals versklavten Personen in der Republik hatten. Sichtbar wird auch, in welchen Beziehungen und sozialen Netzwerken sie lebten, mit welchen Fremdbildern und Zuschreibungen sie durch ihr Umfeld konfrontiert wurden. In der ersten und dritten biografischen Mikrostudie war es zudem möglich, eine Annäherung an das Selbstbild der Betroffenen aus dem historischen Material zu erarbeiten.

Allen biografischen Mikrostudien sind drei Fragen vorangestellt: Inwiefern und auf welche Weise wurden über die In- oder Exklusion in den bzw. aus dem Fa-

---

131 Die »systemische Definition« von Sklavereien nach Zeuske dient der allgemeinen Orientierung.

milienverband durch unfreie Arbeit soziale Zugehörigkeit und Bindung, sozialer Status und Abhängigkeit sowie Verantwortlichkeit erzeugt? Inwiefern spielen Sklaverei, Superioritätsansprüche und niederländisch-koloniale Rassifizierungen und rassistische Stereotypisierungen in den für die Analyse herangezogenen Quellen eine Rolle? Inwiefern kann strategisches Handeln, etwa die Praktik, vor Gericht zu ziehen, um persönliche Freiheitsrechte zu erlangen, als Handlungsmöglichkeit der (vormals) versklavten Personen ausgemacht werden?

Die erste biografische Mikrostudie (Zeitraum: 1680-1717) über das Leben Anthonij van Bengalens setzt mit dessen Ankunft in der Republik 1680 ein. Als etwa siebenjähriger versklavter Junge\* wurde er von dem VOC-Funktionär Rijkloff van Goens in die Republik verschleppt. Kurze Zeit später wechselte er in den Haushalt des Ritters und Kommandeurs Hendrik de Sandra, um nach dessen Tod in den Dienst seiner Erb\*innen zu treten. 1713 kam es zu einem Gerichtsprozess, weil die Erb\*innen die Auszahlung von Geld verweigerten, das van Bengalen seiner Ansicht nach zustand. Soziale und familiäre Zugehörigkeit und Ablehnung stehen im Mittelpunkt dieser biografischen Mikrostudie. Das historische Material gestattet Einblicke in das soziale Umfeld van Bengalens, seine Beziehung zu anderen Dienstbot\*innen des Haushalts und der Familie seiner Dienstherr\*innen. Sozialer Status, Selbst- und Fremdbild sowie niederländisch-koloniale Rassifizierungen und rassistische Stereotypisierungen in Form von Zuschreibungen werden sichtbar durch die Analyse der vorgebrachten Narrationen. Die Analyse der Praktiken zeigt das Verschwimmen der Grenzen zwischen Dienstbot\*innenschaft und Sklaverei auf.

Die zweite biografische Mikrostudie (Zeitraum: ca. 1754-1770) über Christina ist ebenfalls im Spannungsfeld von familiärer und sozialer Zugehörigkeit und Ablehnung zu verorten. Christinas wiederholte Fluchtversuche in die Armenviertel von Amsterdam führten Ende 1768 zu einem Konflikt mit ihrer (Dienst-)Familie und endeten für Christina im *Nieuwe Werkhuis/Spinhuis* (Zuchthaus- und Arbeitshaus für Frauen\*). Analysiert werden über sprachliche Codes transportierte koloniale Rassifizierungen und Versklavungspraktiken, wie sie aus kolonialen Kontexten bekannt sind, vom Schöffengericht, vor dem der Konflikt schließlich verhandelt wurde, jedoch nicht als solche erkannt wurden. Die untersuchten Praktiken werden zurückgebunden an den städtischen Raum, an das zeitgenössische Dienstbot\*innenrecht und die Armenversorgung Mitte des 18. Jahrhunderts in Amsterdam. Thematisiert werden zudem die Lebens- und Arbeitsbedingungen im *Nieuwe Werkhuis*, in dem Christina infolge des Prozesses eingesperrt wurde.

Die dritte biografische Mikrostudie (Zeitraum: 1765-1771) behandelt das Selbst- und Fremdbild von Marijtje Criool und Jacoba Leiland. Mutter und Tochter sahen sich zugehörig zu Surinamischen *Maroons* und forderten in der Republik persönliche Freiheitsrechte ein. Das komplementär zu dem Selbstbild der Frauen\* entworfene Selbstbild des Sklav\*inneneigners Willem Hendrik van Steenberg (ehemals

Justiz- und Polizeirat von Suriname) ist ebenfalls Gegenstand der Analyse. Criool und Leiland verließen 1771, nach einem heftigen Konflikt mit ihrem Eigner, dessen Haus und Dienst und wandten sich an die *Staten-Generaal*, von denen sie Unterstützung und die Zusicherung ihrer Freiheit forderten. An dieser Mikrostudie wird das vermittelte Selbst- und Fremdbild der Frauen\* und van Steenbergs und die jeweils damit verknüpfte Subjektbildung aufgezeigt. Die Bedeutung der familiären Zugehörigkeit der versklavten Frauen\* und deren gezieltes strategisches Handeln sowie die Vorstellung van Steenbergs von Herrschaft und Dominanz über versklavte Personen werden in den Blick genommen. Zudem wird deutlich, welche Wirkmacht die Idee des *free-soil principle* entfalten konnte.
